# Supplementary material for: Peptidomes and Structures Illustrate How SLA-I Micropolymorphism Influences the Preference of Binding Peptide Length
Source: Front Immunol. 2022 Feb 28;13:820881. doi: 10.3389/fimmu.2022.820881 (PMC8918614; doi:10.3389/fimmu.2022.820881)
Supplement: Supplementary file 1 [file Table_1.xlsx]

## Sheet: Sheet1
Table S1. Results of RPLD-MS analysis
Peptide sequence	Score	Length	m/z	Reliability of single site amino acid (%)
MEFVARPP	99	8	473.744	100 100 100 100 100 100 100 100
TLRWD	99	5	345.681	100 100 100 100 100
MEFVARPP	99	8	473.741	100 100 100 100 100 100 100 100
TLRWD	99	5	345.681	100 100 100 100 100
MEFVAR	99	6	376.692	100 100 100 100 100 100
MEFMGPHS	99	8	468.192	100 100 100 100 100 100 100 100
MEFMGPH	99	7	424.675	100 100 100 100 100 100 100
TLRWD	99	5	345.681	100 100 100 100 100
YVDDTQFVRF	99	10	645.312	100 100 100 100 100 99 100 100 100 100
MEFMGPHSLSY	99	11	649.783	100 100 100 100 100 100 99 100 100 100 100
MEFVARPP	99	8	473.744	99 100 100 100 100 100 100 100
MEFVARPPKVQVYSRHPAED	99	20	786.068	100 100 100 100 100 100 100 99 100 100 100 100 100 99 100 100 100 100 99 99
MELVLK	99	6	366.719	99 100 100 100 100 100
VPWLQQEGQDYWDEETR	99	17	1089.99	100 99 100 100 100 100 100 100 99 100 100 100 100 100 100 100 100
TPPAAVLLK	99	9	455.292	100 100 100 100 100 99 100 100 100
KTEPTVTVYPAK	99	12	667.372	100 100 100 100 99 99 100 100 100 100 100 100
KPKLVKWDRDH	99	11	474.606	100 100 100 100 100 100 100 100 98 100 100
MLGLVGK	99	7	359.22	100 100 100 100 100 100 100
FVRFD	99	5	342.179	100 100 100 100 99
KALEGDAEWEAK	99	12	673.833	100 100 100 100 100 99 99 99 99 100 100 100
YWDEETRKV	99	9	613.296	99 100 100 100 100 99 99 100 100
TLLHPLAMDDGLRAF	99	15	557.297	99 99 100 100 100 100 100 100 100 100 100 100 100 100 99
YVDDTQFVRFDNYAPNPR	99	18	739.685	100 100 100 100 100 100 99 99 99 100 100 100 100 100 100 99 99 100
LVRVVE	99	6	357.728	100 100 99 99 100 100
MEFMGPH	99	7	424.675	99 100 100 100 100 100 99
KLQELHL	99	7	440.766	100 100 98 99 100 100 100
LYALR	99	5	318.198	100 99 100 100 99
KAGDELKSLYALR	99	13	488.613	100 100 98 99 100 100 100 100 100 100 100 99 99
MEPRVP	99	6	364.691	100 100 100 99 99 99
MQVLLLDK	99	8	480.283	99 99 100 100 100 100 100 100
WLFLR	99	5	367.721	99 99 100 100 100
LLPEAGFHF	99	9	515.772	99 99 100 100 99 99 99 100 100
AAPLFHVGW	99	9	499.267	99 99 100 100 100 99 100 100 100
ALLDFFLSRK	99	10	605.354	98 100 100 100 100 100 100 99 99 100
HVTLDKPKLVKWDRDH	99	16	497.528	98 99 100 99 99 99 100 100 100 100 100 100 100 98 100 100
VGYVDDTQFVR	99	11	649.823	100 100 100 100 100 100 99 98 99 99 99
HPLYGKF	99	7	431.235	99 98 100 100 100 100 100
WTAADMAAQLTKR	99	13	488.255	100 100 100 100 100 100 100 100 99 100 99 98 98
TNLFVR	99	6	375.219	98 99 100 100 100 100
YLLVH	99	5	322.692	99 100 100 100 98
TFFYGGSR	99	8	467.725	100 100 100 100 100 98 98 99
SSGKVLVEGLNLVK	99	14	481.625	99 98 97 98 100 100 100 100 100 100 99 100 100 100
MEFMGPHSL	99	9	524.734	100 100 100 100 100 100 99 96 99
TAADMAAQLTKR	99	12	638.837	98 99 100 100 100 100 100 99 99 99 99 98
LVRMVL	99	6	365.736	100 100 99 97 100 100
MEFVARPKPVQ	99	11	651.356	100 100 100 100 100 100 100 98 95 100 99
KFALNLK	99	7	417.266	100 100 100 99 98 99 100
KPKLVKWDRDH	99	11	474.606	100 97 98 100 100 100 100 100 98 100 100
KAGDELKSLYALR	99	13	732.415	100 100 100 100 100 100 100 100 100 99 97 97 98
MEFMGPHSL	99	9	524.734	99 100 100 100 100 100 98 98 99
KHVTLDKPKLV	99	11	320.203	99 97 100 100 99 100 100 99 99 100 100
LVKWD	99	5	330.689	99 100 100 99 98
ADMAAQLTK	99	9	474.745	96 99 100 100 100 99 100 100 100
MEFVARPKPVQ	99	11	651.356	100 100 100 100 100 100 100 98 95 100 99
PLTLRWD	99	7	450.751	100 100 100 100 99 96 99
LAFDKVV	99	7	396.236	100 99 100 99 98 99 100
TEPTVTVYPAKTQ	99	13	717.877	97 97 100 100 100 100 100 100 100 100 100 99 97
MADELHYDW	99	9	590.242	99 99 98 98 100 99 99 100 100
LVKWD	99	5	330.689	100 100 100 98 98
MEFVARPPKVQ	99	11	434.574	98 100 100 100 99 99 100 99 99 99 97
YVDDTQFVR	99	9	571.778	100 100 100 100 98 98 99 99 99
LVKWDRDH	99	8	356.858	98 99 100 100 99 98 100 100
PVSLLAFDKVV	99	11	594.356	96 98 99 100 100 100 99 99 99 100 100
VGYVDDTQFVRF	99	12	723.358	99 99 100 100 100 100 98 98 98 99 98 99
KHVTLDKPKLVK	99	12	352.228	99 95 98 98 100 100 100 99 99 100 100 100
KPKLVKWDRDH	99	11	474.606	100 96 96 99 100 100 100 100 99 100 100
EMPFKP	98	6	748.371	99 97 99 100 100 99
SSDLVQAHW	98	9	521.752	99 99 100 100 100 99 98 97 99
MKTKLNEL	98	8	488.778	100 100 100 100 99 97 98 99
AMKPW	98	5	316.664	98 97 100 100 99
KMLVEVKHPLVKH	98	13	519.982	96 93 100 99 100 100 100 100 100 100 100 100 100
KDYEEDFKTA	98	10	623.287	99 99 98 99 99 99 100 100 98 97
MEFMGPHSLSYF	98	12	723.319	95 99 100 100 99 99 97 99 99 99 100 100
FMGPHSL	98	7	394.691	100 100 100 100 98 96 99
YFYTA	98	5	664.298	99 99 100 99 98
FLVQR	98	5	331.702	100 100 100 98 97
LTADVLKQVK	98	10	557.846	100 100 100 100 100 99 99 95 98 99
SVDEAAHHF	98	9	338.154	95 95 100 100 100 100 100 100 100
TADLLTFHF	98	9	532.775	95 95 100 100 100 100 100 100 100
MEPRVP	98	6	364.691	100 100 100 98 97 98
MEFMGPHSLSY	98	11	649.783	97 100 100 100 100 100 98 96 96 100 100
MEFVARPKPVQ	98	11	651.356	99 100 100 100 100 100 100 95 94 100 99
FLAA	98	4	421.244	99 98 99 99
VNDEGLLEDARF	98	12	689.337	96 96 100 100 100 100 100 100 100 98 97 99
MADAQWHEW	98	9	587.242	98 99 100 99 95 99 99 100 100
AADMAAQLTKR	98	11	392.545	99 98 99 99 100 100 98 99 97 97 98
AGYARNF	98	7	399.698	100 100 100 99 97 97 99
AYVKLQ	98	6	361.216	98 99 100 100 100 97
KDNAQTYGVGLNTLR	98	15	825.434	100 100 100 100 100 100 100 100 100 98 95 95 97 99 98
PVSKLF	98	6	345.712	99 99 99 97 99 99
MEYMGPHSL	98	9	532.732	99 100 100 99 100 100 96 96 99
KPLKVKWDRDH	98	11	356.207	98 95 98 98 100 100 100 99 98 100 100
FFYGGSR	98	7	417.2	100 100 100 99 97 97 98
FKMPF	98	5	335.175	97 99 99 99 99
WDEETRKV	98	8	531.765	100 100 100 100 98 96 96 99
TVPLLLHSW	98	9	533.309	97 97 100 100 100 99 96 98 99
LRLRL	98	5	335.739	97 99 100 99 98
LVTEWVKG	98	8	466.266	99 97 99 99 99 99 98 98
KPLVKWDRDH	98	10	431.907	98 97 100 100 100 99 98 97 99 99
LDLVGKL	98	7	379.244	96 98 100 100 99 98 99
KPKLVKWDRDH	98	11	711.404	100 100 100 100 100 99 97 98 97 99 94
ALERTF	98	6	368.703	100 100 100 97 97 97
WSTAADMAAQLTKR	98	14	517.266	93 93 98 99 100 100 100 100 100 99 99 99 99 98
KPKLVKWDRDH	98	11	474.606	100 99 98 98 99 99 99 99 95 98 96
WTAADMAAQLTKR	98	13	488.255	95 95 100 99 100 99 100 100 99 99 98 98 99
VTDDLLHPW	98	9	548.278	100 99 100 99 91 98 100 100 100
MEPRVPWLQQEGQD	98	14	856.908	97 99 96 95 98 99 99 100 99 99 100 100 97 99
VLSPNSDGTYYTRW	98	14	829.895	96 99 100 100 100 100 100 100 99 97 97 97 97 96
VTLDKPKLVKWDRDH	98	15	463.263	98 98 100 100 100 97 97 100 100 100 99 99 95 98 95
RLLTGTRVE	98	9	348.876	89 99 100 100 100 99 99 99 99
KHVTLDKPKLV	98	11	426.603	99 97 100 99 97 99 100 99 94 98 100
HLDFVRA	98	7	429.235	100 100 100 100 98 94 96
MMPGYVAHF	98	9	526.739	95 94 100 99 99 99 99 99 100
FKMPF	98	5	335.175	97 99 99 99 97
FLVPQGK	98	7	394.737	100 100 100 100 97 93 98
KALEGDAEWEAK	98	12	449.558	96 96 96 96 95 99 100 100 100 100 100 99
ALDELLARY	98	9	532.293	95 97 100 100 100 100 98 96 97
MEFVARPPK	98	9	358.863	87 97 100 100 100 100 100 100 100
SLDHNKVFR	98	9	372.536	98 98 100 99 99 99 98 97 95
YLLVHTE	98	7	437.737	100 100 100 100 97 93 98
VNDEGLLEDARF	98	12	689.337	99 99 100 100 99 100 100 100 100 96 90 95
LAPELSHYF	98	9	538.776	92 95 100 100 99 99 99 100 100
DGLRAF	98	6	339.682	98 98 100 98 97 97
WLGFDK	98	6	383.2	100 99 95 96 100 99
MVLTRL	98	6	366.725	100 100 99 97 96 97
KGPFLDLHLLK	98	11	427.595	96 91 93 99 100 100 100 100 100 100 100
KTVPEAGHFA	98	10	352.853	93 92 97 99 100 100 100 99 100 100
MEFVARPPKVQVY	98	13	782.422	100 100 100 100 100 100 100 92 89 95 99 100 100
FLAVGYVDDTQFVR	98	14	815.418	97 99 100 100 100 100 100 100 100 95 89 96 98 99
MEYMGPHSLSY	98	11	657.779	99 100 99 97 98 98 90 97 99 100 100
LTLRDW	98	6	402.224	98 100 99 97 96 96
ELMGDLEHF	98	9	545.749	94 94 100 99 99 99 99 98 100
PNLFLR	98	6	380.226	98 96 99 99 98 98
MEFMGPHSLS	97	10	568.25	100 100 100 100 100 100 91 93 97 100
PLEDVLLF	97	8	473.269	92 93 99 100 100 100 100 100
EGMAAQLTKR	97	10	552.796	92 92 100 100 100 99 100 99 99 99
TLRWE	97	5	352.689	100 100 100 98 92
KALEGDAEWEAKLL	97	14	524.948	92 93 95 97 97 99 99 100 100 100 100 100 100 100
EPLTLRWD	97	8	515.272	98 92 100 100 100 99 96 98
TDALKLL	97	7	387.241	90 96 100 100 100 100 100
VRLDGFRKG	97	9	349.873	99 91 97 100 100 100 99 97 98
ALLDFFLSRK	97	10	403.906	88 94 100 100 100 100 100 99 99 99
MLLLTR	97	6	373.733	93 99 100 99 98 98
YTAVSRDP	97	8	454.727	100 100 100 100 99 94 96 95
TLLHPLAMDDGLRAF	97	15	557.297	96 96 99 97 98 97 98 100 100 100 99 97 95 98 99
KVLADYEERAK	97	11	441.242	100 100 100 100 100 100 100 100 95 89 92
MFEPMELTNDAVLK	97	14	819.401	83 97 100 100 100 100 100 100 97 97 98 99 100 99
VALVKAAEAAKAGA	97	14	635.38	82 91 100 100 100 100 100 100 100 100 100 100 98 100
LLPLEDVFSLSGR	97	13	723.404	97 97 100 100 100 100 100 99 97 97 93 94 97
ELDGHYVHF	97	9	372.842	92 93 100 100 98 99 100 99 100
DLRSW	97	5	338.674	98 99 99 99 93
TAADMAAQLTKR	97	12	638.837	99 99 100 100 100 100 99 98 98 91 93 97
WTAADMAAQLTKR	97	13	731.878	95 98 100 100 100 99 99 99 95 95 95 97 98
AAVTMPSSKL	97	10	502.776	94 94 99 100 99 98 98 97 98 99
TVYALR	97	6	361.714	93 95 100 100 100 99
FLLKQ	97	5	324.707	98 99 100 99 93
SSGKVLVEGLNLVKK	97	15	524.323	98 95 90 90 97 100 100 100 100 100 98 99 99 100 100
FMGPHSLSY	97	9	519.74	99 99 100 99 92 93 97 100 100
KLSELEADLEKLTRK	97	15	444.009	95 92 91 97 100 100 100 100 100 100 100 100 97 95 98
DMAAQLTKR	97	9	345.186	93 88 100 100 99 100 100 100 99
ALPDDLHPF	97	9	512.759	95 96 100 99 97 97 98 98 97
KAAVTMPSSKL	97	11	566.823	100 100 100 100 100 99 90 90 99 97 97
KLPYYTHHY	97	9	407.873	87 93 100 100 100 99 99 100 100
NVTLPEAEELK	97	11	621.833	82 94 100 100 99 99 100 100 100 100 100
LHPLAMDDGLRAF	97	13	485.919	95 82 95 98 99 100 100 100 99 99 99 99 100
GLFDDRFRF	97	9	391.533	92 97 99 99 98 95 98 99 99
KLLTLLQG	97	8	443.292	90 99 100 100 100 100 95 98
LGFYPK	97	6	362.704	97 91 99 99 99 99
VLPQGKAVPATK	97	12	403.583	95 95 98 96 95 98 97 98 98 99 100 100
MEFVARPKPVQVY	97	13	782.422	100 100 100 100 100 100 97 88 89 95 99 100 100
YTAVSRP	97	7	397.215	98 99 99 99 96 94 96
MEFMGPHSLSYF	97	12	723.319	90 99 100 100 99 98 86 98 99 100 100 100
AADELLTRY	97	9	526.272	100 100 100 100 100 100 95 90 91
FLVER	97	5	332.195	99 99 98 97 92
HVQHEGLQEPLTLRDW	97	16	653.334	85 89 93 96 100 98 98 100 100 100 100 100 100 99 99 99
MEFMGPHSLSY	97	11	649.783	97 100 100 100 100 98 89 92 95 100 100
MEFVARPKPVQVY	97	13	782.422	100 100 100 99 97 98 99 91 88 94 98 100 100
MNKTQLLDVLAEKAELSKTQA	97	21	777.759	63 88 100 100 99 100 100 100 100 100 100 100 100 100 100 100 100 100 100 95 96
KVRFF	97	5	348.714	100 98 94 95 99
KPKLVKWDRDH	97	11	356.207	95 89 91 98 100 100 100 98 98 100 100
MDAAQLTKR	97	9	517.277	94 99 100 100 98 97 95 93 97
KLDALLKPF	97	9	348.886	94 93 99 99 100 100 99 94 96
KHVTLDKPKLVKWDRDH	97	17	423.843	98 94 99 100 98 95 92 88 90 100 100 100 100 100 98 100 100
LLPPLSNN	97	8	434.25	99 99 100 98 94 97 94 96
YWDEETR	97	7	499.715	90 95 99 99 99 99 98
MEFVARKPPVQ	97	11	651.356	97 100 100 100 99 97 97 86 93 100 98
TPPAAVLL	97	8	391.244	97 93 93 95 98 99 100 100
ALLDFFLSRK	96	10	403.906	88 93 98 100 100 100 100 98 96 96
LVVEGLNLVKK	96	11	404.595	85 97 100 100 100 96 90 99 100 100 100
VTDPHDYSF	96	9	540.735	97 97 100 99 86 96 97 100 100
ALEQLLEHF	96	9	550.293	92 91 98 93 99 100 100 100 100
ALEDVVHDF	96	9	522.755	96 97 100 100 100 100 88 94 99
YGYNQSEAGSHT	96	12	657.273	90 86 99 99 98 99 100 100 100 99 94 98
GLRLY	96	5	311.189	92 97 97 99 100
MPFPK	96	5	310.167	93 96 99 99 97
EVDATLARF	96	9	511.27	92 86 100 99 99 99 99 98 99
LQQEGQDYWDEETRKV	96	16	1012.47	88 74 100 100 100 100 100 99 99 100 99 98 98 99 94 98
WSRLDTAADMAAQLTKR	96	17	484.254	97 90 90 86 92 98 100 100 100 100 100 100 99 99 98 98 99
KPLVGSLVKWDRDH	96	14	413.235	87 86 96 96 94 97 100 100 100 100 99 98 100 100
MEPRVPWLQQEGQDYWDEETRKV	96	23	973.795	98 95 83 80 91 93 97 99 100 99 100 99 99 100 100 100 100 100 100 100 100 93 96
WDEETRKV	96	8	354.845	94 83 97 100 100 99 100 100
LTADVLKQVK	96	10	372.232	98 88 96 100 100 100 97 90 97 99
LLDTQLARW	96	9	558.315	100 99 100 96 94 97 96 92 95
TADFGDLRY	96	9	529.252	91 90 100 99 97 99 98 98 98
TADFGDLRY	96	9	529.251	91 90 100 99 97 99 98 98 98
EVDATLARF	96	9	511.27	95 88 99 99 99 99 97 96 96
RFLAV	96	5	303.191	87 96 100 100 100
LAPELLERY	96	9	552.309	93 96 100 100 100 98 96 88 97
VAPYPQ	96	6	337.679	86 92 100 100 100 100
EHGLAGEPLTLRWD	96	14	531.94	94 85 97 97 86 92 100 100 100 100 100 100 99 100
MEFVARPPKVVQ	96	12	700.89	98 100 100 100 97 90 97 97 93 98 98 90
MEFVARPPKVQVY	96	13	782.422	95 99 100 99 100 100 97 85 85 93 99 100 100
MEFVARPPKVQ	96	11	434.574	96 99 100 100 100 100 99 86 83 99 97
QGDYWDEETR	96	10	649.768	73 90 100 100 100 100 100 100 100 99
MMDTVSHKY	96	9	371.169	81 90 100 100 100 100 97 99 100
KAAVTMPSSKL	96	11	378.218	94 92 91 88 95 99 100 100 100 99 98
KGSSVLVEGLNLVKK	96	15	785.98	84 82 98 100 100 100 100 100 97 95 90 96 100 100 100
LELDPNK	96	7	414.727	98 98 99 99 98 88 94
YWDEETR	96	7	499.715	85 92 99 99 99 99 99
FAAVLVKAAEAAKQA	96	15	496.624	78 85 98 99 100 100 100 100 100 100 100 100 100 90 93
MEFVARPPK	96	9	358.863	72 93 99 100 100 100 100 100 100
EQYLELDHW	96	9	616.783	88 79 100 100 100 99 100 100 100
LADMFNYKF	95	9	574.777	89 89 98 93 99 98 99 99 99
MVDVDQHWY	95	9	596.758	99 99 100 99 90 83 96 98 99
LNVTLPEAEELK	95	12	678.376	68 83 100 100 100 100 100 100 100 100 100 100
KALTLGLGLR	95	10	347.897	85 86 93 97 100 100 100 98 99 99
MEFMGPHS	95	8	468.192	98 100 100 100 99 98 79 93
GVGLNTLRG	95	9	443.759	90 95 100 100 98 97 97 89 96
EELL	95	4	503.272	95 89 100 100
EVEHELHDY	95	9	585.756	92 81 97 98 100 100 99 99 97
DPFYARPKPVQVYSRHPAED	95	20	791.399	85 80 98 99 100 99 99 93 99 100 100 100 100 99 99 99 99 98 82 88
RVPWLQQEGQDYWDEETRKV	95	20	854.752	96 91 96 98 99 90 90 100 92 83 100 100 100 100 100 100 99 96 90 95
KDLETQSQDGTFDKLTK	95	17	651.997	73 81 92 99 96 90 100 99 100 99 99 99 100 99 100 100 100
MEYMGHP	95	7	432.673	93 97 96 93 97 95 97
VVLPKNYAR	95	9	353.881	85 96 98 99 99 98 97 96 92
TNLFSVR	95	7	418.735	99 90 99 99 94 92 96
LVDLLAHLSK	95	10	370.229	82 77 98 99 100 100 100 100 100 100
WSRLTAADMAAQLTKR	95	16	455.496	70 75 92 98 100 100 100 100 100 100 100 99 100 99 99 98
FVARPP	95	6	343.702	99 98 96 90 92 97
LRLRL	95	5	335.739	97 97 98 92 92
MQVLLLDK	95	8	480.283	89 92 100 100 100 99 92 92
LYGKF	95	5	314.177	100 100 98 95 85
LVVALERF	95	8	473.79	100 100 100 99 96 94 84 91
LMPAVEHSF	95	9	515.755	80 80 100 100 100 100 100 100 99
LQQEGQDYWDEETRKV	95	16	1012.47	79 69 100 100 100 100 100 100 100 100 100 100 100 100 89 93
KADELVLPW	95	9	535.798	88 82 95 97 98 100 100 100 100
QGDYWDEETR	95	10	649.768	65 90 100 100 100 100 100 100 100 99
TELVKV	95	6	344.715	91 93 99 98 95 96
WSLLLPPLSNN	95	11	627.349	84 74 95 100 100 100 99 98 99 99 100
RVPWLQQEGQDYWDEETRKV	95	20	854.752	96 91 93 96 99 90 91 100 94 92 100 100 100 100 100 100 99 96 81 89
ALDWQLAHY	95	9	558.778	82 87 100 99 98 99 99 95 99
RLPWDFHHY	95	9	424.209	87 86 91 97 100 100 99 99 99
KLPFESVHF	95	9	368.534	91 93 97 97 96 98 98 94 94
VKGSSLVEGLNLVKK	95	15	393.493	80 71 86 97 98 99 100 100 100 100 99 100 100 100 100
MTDVFHSPY	95	9	548.743	93 80 95 96 99 98 99 99 98
ALDAAKFHF	95	9	510.27	83 82 99 98 98 98 99 99 100
ALDAAKFHF	95	9	340.515	79 82 99 100 100 100 100 100 100
EADDMAAQLTKR	95	12	674.831	95 79 91 99 96 98 99 97 98 95 97 98
KTPPAAVLLK	95	10	346.561	78 81 95 99 100 100 100 100 100 100
LLHPLAMDDGLRAF	95	14	523.615	73 85 82 96 100 100 100 100 100 100 100 100 100 99
HVQHEGLQEPLTLRDW	95	16	653.334	67 77 90 97 99 98 98 100 100 100 100 100 100 99 99 99
KLPKVKWDRDH	95	11	356.207	91 80 87 97 100 100 99 99 96 99 100
VTKTPPAAVLLKKAAAVK	95	18	452.295	69 70 88 99 100 100 99 97 99 100 100 100 99 100 98 96 100 100
KEGVSKDDAEALK	95	13	463.912	91 93 78 88 99 99 98 98 96 98 99 100 100
TADLLTFHF	95	9	532.775	94 88 94 90 97 97 98 98 99
LQQEGQDYWDEETR	95	14	898.889	70 66 100 100 100 99 100 100 100 100 100 100 99 99
HCGQDYWDEETRKV	95	14	883.386	55 85 95 97 100 100 100 100 100 100 100 100 99 100
TAADMSAQLTKR	95	12	646.836	100 99 100 100 81 79 97 95 98 97 97 98
HDMALLKDF	95	9	363.852	69 94 96 97 100 100 100 100 100
KYVLDSDE	95	8	484.733	90 87 95 94 95 98 100 100
KNYEEEHNW	95	9	624.762	90 85 100 100 100 96 92 94 98
SEALKLLNNLR	95	11	424.254	72 88 98 100 100 100 99 96 94 99 99
DAEALTLLLEEAGAEVEVK	95	19	667.358	84 78 97 98 98 86 78 90 100 100 100 100 99 99 99 99 100 100 98
KPKLVKWDDR	95	10	321.94	84 82 93 99 99 99 98 99 99 98
MEFMGPHSLSYF	94	12	723.319	88 98 100 100 99 93 68 96 98 98 100 100
LLEAL	94	5	558.35	98 95 99 95 87
FGVEVK	94	6	339.694	99 97 96 97 86 93
EADALKKALEEAQEVEVK	94	18	667.358	86 71 93 94 95 92 89 97 99 100 100 99 95 98 99 100 100 99
KFVRF	94	5	348.714	100 95 92 91 96
KADAFAVLVKAAEAAKAQ	94	18	601.345	94 82 89 94 99 99 100 100 100 99 99 99 88 82 99 99 95 91
ANAMVLPELVDQVVEVVQR	94	19	1055.07	77 72 88 86 98 100 100 100 100 100 100 97 97 99 99 98 96 97 99
SGDYLKHTW	94	9	369.513	79 79 96 99 100 100 100 100 99
FFYGGS	94	6	677.294	99 99 99 99 83 89
TGDTVVHHF	94	9	506.747	80 76 99 100 100 100 100 98 99
EQPLTLRDW	94	9	579.302	86 80 100 100 99 98 93 97 98
MEFVARPPKVQ	94	11	434.574	74 95 99 100 99 99 99 91 89 99 96
LEEHNMSKF	94	9	567.766	90 93 95 96 85 92 100 100 100
KGFAGTVKRW	94	10	383.891	96 68 91 100 100 100 100 98 98 97
AVVESLQR	94	8	451.259	79 93 100 100 98 96 92 98
LSDEAHGEY	94	9	510.718	98 97 97 99 99 82 85 94 99
KLVKWDRDH	94	9	399.555	83 84 99 100 100 97 91 99 99
ALKALEGDAEWEAK	94	14	510.932	86 77 92 91 90 95 99 100 100 99 99 100 99 99
LGLVKAAEAAKAQ	94	13	635.38	57 85 100 100 100 100 100 99 97 99 100 99 96
EMPFPK	94	6	374.688	90 78 100 100 100 100
TADPYPHYY	94	9	563.746	88 89 100 99 98 98 85 95 99
VPWLQQEGQDYWDEETRKV	94	19	802.718	99 98 99 98 85 88 98 82 62 99 100 100 100 100 100 99 97 95 97
EMFVARKPPVVQ	94	12	700.89	94 85 100 100 99 98 90 87 97 100 97 88
MDAAQLTKKR	94	10	387.885	89 97 100 99 98 98 95 88 86 95
GLAGEPLTLRDW	94	12	664.355	72 79 90 97 100 100 100 99 99 99 99 99
LVVPEPGEQSYTDCCSHVQ	94	19	697.644	97 99 100 100 100 98 98 99 96 98 97 94 72 72 88 91 98 99 97
TVVTEWVKG	94	9	509.782	81 83 99 98 98 97 98 97 98
VPQLELVPN	94	9	504.791	90 80 88 98 100 100 100 99 97
EAPWVTHDW	94	9	570.761	90 81 94 90 98 98 99 100 100
TPKLQVY	94	7	424.748	99 98 96 86 81 100 100
VTKTPPAAVLLKK	94	13	342.226	74 74 87 95 98 100 100 100 100 100 100 100 100
LVRMVL	94	6	365.736	100 100 94 79 95 100
ALGFYPK	94	7	398.224	85 85 97 97 98 99 99
WSTLVR	94	6	381.218	84 85 99 99 99 99
TDLVNVAK	94	8	430.247	81 92 100 100 96 97 94 95
TLVRVVE	94	7	408.253	95 95 95 78 97 100 100
MERPVPWLQQEGQDYWDEETRKV	94	23	730.601	98 98 88 73 86 91 97 99 87 97 99 88 82 99 100 100 100 100 100 99 97 94 97
ETALQKDHF	94	9	363.517	86 77 91 99 97 99 100 99 99
FEMVARPPK	94	9	358.863	73 88 90 100 99 99 99 99 99
EMMY	94	4	573.205	95 82 100 100
LALSERPALNS	94	11	585.828	100 100 100 100 99 99 82 78 80 98 99
VDVDAEFEEVKDKK	94	14	413.461	72 79 87 94 94 98 99 99 99 99 98 99 100 100
EPGVNPQNTLFALKR	94	15	842.462	91 73 78 83 99 99 99 98 99 100 99 97 98 99 99
YTEFTPTEKD	94	10	615.781	95 99 100 100 100 99 98 96 67 86
VLDPWEHPF	94	9	570.28	73 83 98 98 99 99 99 98 98
KETVWRL	94	7	466.272	99 99 95 85 92 92 96
DDLSGKMPNLR	94	11	415.88	82 79 90 99 99 99 100 99 94 95 97
AAKDVKFGNDVAR	94	13	464.253	68 89 92 99 100 100 100 96 92 97 96 95 97
SSKGVLVNLVEGLNLVKK	94	18	475.043	96 78 78 81 96 97 92 86 99 100 100 98 97 97 99 99 100 100
GYVDDTQFVGVFDNYAPNRP	94	20	758.692	98 99 100 100 100 100 99 99 100 84 75 93 98 97 99 99 98 95 69 78
KTTVFTPPAAVLLK	94	14	495.974	75 78 79 86 99 100 100 100 100 99 99 100 100 100
VKKNVLSSGKVLVEGLNLVK	93	20	708.776	73 68 94 70 92 97 98 97 97 99 100 100 100 100 98 97 98 100 100 100
FADVKKVDVTGTSKG	93	15	517.95	90 87 95 89 90 99 99 100 100 99 95 96 97 85 86
TLGLEAR	93	7	380.221	97 94 96 94 94 91 90
VVAGTVVL	93	8	379.245	100 98 86 78 90 99 100 100
EMLVETRSPDGGTFQ	93	15	833.891	99 97 100 100 100 100 100 89 75 89 80 86 93 100 98
TPGTKLELFPTPFTYK	93	16	614.002	78 70 78 86 96 98 98 99 100 100 100 100 99 100 100 100
VPWLQQEGQDYWDEEEKKV	93	19	802.718	100 100 100 100 100 99 100 99 99 100 100 100 100 100 100 61 48 84 93
FLVPQGKAVPATKK	93	14	495.305	97 99 100 97 91 66 78 98 98 96 95 99 100 100
VPCVLQQEGQDYWDEETRKV	93	20	808.048	94 85 93 93 93 86 91 100 86 74 99 100 100 100 100 100 99 97 91 95
TAALVTADVLKQVK	93	14	486.296	83 86 96 93 86 97 88 95 99 99 98 96 98 99
ESALKLLN	93	8	444.262	85 82 99 100 98 97 96 92
KGLTDAAQQVVAAVEGK	93	17	842.966	62 57 86 100 99 99 96 96 99 100 100 100 100 100 100 100 100
MEFVARPPKVQVYSR	93	15	452.497	69 89 98 98 75 79 99 100 100 100 100 100 100 100 99
YLLVTH	93	6	373.216	98 99 99 97 90 79
KVPWLSK	93	7	429.268	100 100 98 96 96 80 86
LNEDLRSWTA	93	10	602.802	98 99 100 100 99 84 83 83 95 96
VMGQALEPLVDQVVEVVQR	93	19	703.718	96 66 59 73 99 100 98 93 99 100 100 99 100 100 100 100 100 100 100
KALEDGAEWEAK	93	12	673.833	100 100 100 100 90 62 78 95 99 100 100 100
TVEVLNHAW	93	9	534.778	87 85 99 98 96 92 89 98 99
TGDTLAHQW	93	9	514.744	87 80 94 94 99 99 94 95 99
WSELRLKSNLTTPR	93	14	567.654	97 93 85 68 84 100 99 99 98 99 100 97 92 99
LHLPLAMDDGLR	93	12	450.911	43 86 99 98 99 100 100 100 100 100 100 100
QGDYWDEETRKV	93	12	763.35	61 86 100 100 100 100 100 99 99 99 87 93
VVSSALGHEW	93	10	542.775	100 99 91 80 83 99 99 92 96 97
TVEQESHWY	93	9	589.756	72 79 100 98 99 98 98 99 99
VTKTPPAAVLLK	93	12	413.267	62 67 94 100 100 100 100 100 100 100 100 100
TADELLQKY	93	9	540.783	79 79 99 100 99 98 92 98 98
LHLPLAMDDGLRAF	93	14	523.615	69 62 88 93 100 100 100 100 100 99 100 100 100 99
VLVKAAEAAKQA	93	12	400.243	61 82 88 99 100 100 100 100 100 99 95 99
YPQRTKPLQVYSRHPAED	93	18	729.044	73 65 81 89 95 92 94 100 100 100 100 99 99 100 100 100 100 100
KPTLADKYFAK	93	11	427.916	72 67 91 99 100 100 100 100 100 100 100
SALGRLP	93	7	357.219	98 99 99 89 82 90 97
SLKTPAPAVLLK	93	12	619.398	68 87 100 100 100 99 75 94 98 100 100 100
LGDEFNQHW	93	9	573.255	77 82 100 100 98 92 94 99 100
TVRGSGTVVTGR	93	12	397.227	92 88 96 69 79 99 100 100 100 99 100 100
RFVKHPLYFGK	93	11	348.704	79 82 95 98 97 100 100 98 91 89 96
TAADMAAQLTKKR	93	13	468.926	99 99 100 99 79 96 95 86 84 91 95 92 98
NEDLRQQQAADTAAQLTKR	93	19	719.708	66 84 99 96 93 80 71 88 100 100 100 100 100 100 100 100 99 99 99
WSLLLPPLSNN	93	11	627.349	70 68 93 100 100 100 99 97 99 99 100
LAPDDLHFP	93	9	512.759	89 87 98 99 96 91 92 93 94
ANALEPLVDQVVEVVQR	93	17	627.016	60 63 91 96 95 90 100 100 100 100 100 100 100 100 100 98 94
LGLVKAAEAAKQA	93	13	423.922	68 71 99 99 99 100 100 100 100 100 99 86 92
MFTLNAERVKEQGKGASR	93	18	405.217	68 80 95 99 99 97 99 75 74 96 99 98 99 100 99 99 99 99
FNLPGSK	93	7	381.711	98 98 100 100 97 75 84
KAGDELSKL	93	9	320.85	95 87 92 98 99 100 92 83 91
FVTKTPAPAVLLK	93	13	692.933	85 86 100 100 100 100 98 63 90 97 95 98 99
RVALADKYFA	93	10	385.217	74 76 96 100 100 100 97 94 98 98
TVMDQDHF	93	8	496.712	90 85 95 95 90 94 96 99
FDLLKQ	93	6	382.22	78 90 100 100 98 93
KGLDLVRMVL	93	10	381.902	86 87 97 93 90 99 92 89 99 99
VGAATEVEMKE	93	11	582.285	98 98 98 99 99 99 98 98 72 76 89
LGDAPDGLLNSLAAVKSGTKA	93	21	666.701	60 56 99 95 93 94 82 100 100 100 100 100 100 100 100 100 98 94 95 94 97
LLPLEDVFSLGSR	93	13	723.404	97 96 100 100 100 100 99 99 94 92 63 74 97
TADMLLDKF	93	9	527.268	92 90 100 99 99 84 80 97 98
HPETLVKV	93	8	461.773	96 71 91 90 97 99 100 100
ANDLVTHLW	93	9	534.778	63 77 100 100 100 100 99 100 100
FSGFEGR	93	7	400.19	99 99 99 97 97 77 83
GFKMPF	93	6	363.685	71 88 100 100 100 100
VPWLQQEGQDY	93	11	681.82	97 94 98 97 80 76 97 93 90 100 100
KLLLVE	93	6	357.741	76 85 98 100 100 100
LLPPLSNN	93	8	434.25	99 99 100 93 80 91 89 92
EGMAAQLTKRK	93	11	411.564	91 91 100 100 100 98 98 90 84 75 96
KVDLTADVLKQVK	93	13	728.94	89 88 99 99 99 95 97 96 97 97 73 81 98
MEFVARPKPVQ	93	11	434.574	80 96 100 100 99 99 98 81 73 99 96
EADVVFEEVKDKK	92	13	512.603	87 57 86 97 99 100 99 98 95 92 97 100 100
SLKTPPAAVLLK	92	12	413.267	51 68 94 100 100 100 100 100 100 100 100 100
RLPYEDHHY	92	9	410.528	81 79 85 93 100 100 100 99 99
KHVTLDKPKLVK	92	12	469.302	100 99 100 98 93 97 99 76 60 94 99 100
TAADAGAQLTKR	92	12	401.554	97 92 86 78 86 95 96 95 98 96 96 98
WSTLVRVVE	92	9	544.81	81 90 100 100 99 85 85 96 98
WSRLDTAADMAAQLTKR	92	17	484.254	86 81 78 67 75 92 100 100 100 100 100 100 100 100 100 100 100
QLPPGFKMPF	92	10	581.311	66 91 100 99 89 91 99 99 97 96
FYYAT	92	5	664.298	85 85 99 98 97
FEDGKKVRFF	92	10	424.896	98 98 97 82 91 99 98 88 86 90
FYTAVSRP	92	8	470.747	98 98 99 97 96 91 69 91
AVEAFVHGGW	92	10	536.764	62 74 100 99 98 99 98 97 98 100
KERFTVL	92	7	446.766	96 96 79 82 95 100 100
ETLTP	92	5	560.293	85 81 99 99 98
GVGLNTLHAAP	92	11	525.291	97 96 99 99 96 97 99 69 72 96 97
PLEDVLLF	92	8	473.269	70 80 97 98 98 98 98 99
TAADMAAQLTKR	92	12	426.227	88 82 93 88 92 99 100 98 97 90 88 92
NEDLRSW	92	7	460.216	72 84 99 98 97 98 99
LVFLPSGHP	92	9	483.775	80 84 99 99 93 92 94 92 98
VAFDKLKSL	92	9	340.874	61 78 96 99 99 100 100 99 99
ESPRSTYGVGLNTLRGY	92	17	623.987	79 61 66 77 92 99 100 100 100 100 100 100 100 100 99 99 100
MEFVARPKPVQ	92	11	434.574	78 95 100 100 98 97 97 79 77 99 96
EPAHCCVTDQPGP	92	13	677.287	97 91 95 69 84 99 100 99 99 92 85 93 96
TLLNEKAAG	92	9	458.758	99 99 99 94 96 79 77 92 96
KEADATLAPSLDLVGKL	92	17	580.997	72 78 65 73 85 98 100 100 100 100 100 100 100 100 100 100 100
EMFVARPKPVQ	92	11	651.356	98 96 100 99 88 88 95 80 77 99 95
EMPFPK	92	6	374.688	90 69 98 99 99 99
KPLVSGLVKWDRDH	92	14	413.234	85 82 92 82 70 94 100 100 100 99 96 96 98 96
QLQELAGATK	92	10	529.795	82 91 94 99 99 99 82 82 95 97
KVAEFFG	92	7	399.213	89 75 88 96 98 100 100
YVLP	92	4	491.287	95 88 95 91
AQDVLGKLW	92	9	515.291	70 70 98 99 99 98 97 100 100
RSPGLRLY	92	8	321.19	70 78 93 100 100 99 99 99
KPLGLVKHWDDR	92	12	366.708	94 81 85 83 97 100 100 98 85 87 99 98
TVLKKVPLALR	92	11	413.284	69 71 93 96 99 100 100 100 96 93 95
MLSHDVKGF	92	9	345.176	61 77 98 97 99 99 99 99 99
KAAVTMPSSKLK	92	12	420.916	86 79 85 79 91 98 100 100 96 91 100 100
LNEDLRSW	92	8	516.759	95 97 100 99 91 85 86 82
SEALKLLNNLR	92	11	424.254	62 79 92 95 100 100 99 97 92 97 99
RLDKSYTHY	92	9	394.868	65 74 95 96 100 99 100 99 100
KHVTLDKPKLVKWDDRH	92	17	529.553	96 93 99 100 98 99 100 95 85 99 100 99 99 98 60 50 94
KVHPLYKGFLK	92	11	443.94	82 81 99 100 100 99 79 74 99 100 100
KGVSSLVEGLNLVKKHQ	92	17	459.773	89 82 92 92 92 92 80 92 82 82 96 98 99 100 100 99 98
EMYMGPHSLSY	92	11	657.779	74 49 98 100 100 100 95 97 99 100 100
EGMAAQLTKR	92	10	368.866	74 63 86 100 100 99 100 99 99 99
WRSVKDVPKEREYR	92	14	370.404	77 77 94 98 98 99 99 99 96 93 82 94 89 91
KLQLVGVGYR	92	10	378.233	84 79 75 93 99 100 100 98 95 96
TEDFTLDRW	92	9	591.774	62 72 98 100 100 99 99 98 99
KAATYEQLKAAV	92	12	646.864	98 93 97 95 90 88 84 100 93 77 88 99
RDDEVLVLTGKDKGK	92	15	418.986	44 59 84 99 100 100 100 100 100 98 97 99 100 100 100
EVDAAVHTF	92	9	494.74	88 74 87 85 98 99 98 99 99
ALLDFFLKDKK	91	11	446.603	96 98 100 100 100 100 96 80 51 90 99
FYTFR	91	5	367.187	99 97 92 83 88
VAEDGFGETLLSER	91	14	761.875	82 89 100 100 100 100 99 99 99 100 99 88 63 68
VVDASNGFEVKDKK	91	14	384.704	90 82 94 94 92 84 75 85 99 96 96 99 100 100
MADYLEHRW	91	9	610.778	61 85 100 100 99 99 93 92 97
LKYFQGKAVVE	91	11	641.364	99 99 100 99 96 95 79 66 78 100 100
QLPPGFKMPF	91	10	581.311	65 89 100 99 90 91 98 96 94 96
TVDVNEHSY	91	9	532.239	87 89 100 98 73 85 96 99 99
KLLANLPDF	91	9	515.801	94 96 95 70 71 99 100 100 100
TVLNTKLKFP	91	10	387.572	72 76 98 95 98 98 98 96 93 92
TLLHPLSMDDGLRAF	91	15	562.628	96 97 100 99 99 98 90 88 100 100 97 96 56 63 95
MLPEKRLLR	91	9	385.906	96 96 94 96 72 74 98 98 99
VLPQGKAVPATK	91	12	604.872	98 97 98 92 91 96 62 69 98 99 100 100
YEELGKLDLVRVPF	91	14	559.98	78 86 95 92 97 98 99 100 100 99 80 74 93 93
RLDYVRTFP	91	9	583.82	86 88 95 97 90 82 96 94 94
GPAGPLGPV	91	9	764.43	96 95 96 95 75 87 98 88 94
KQEVLNDHY	91	9	382.523	86 62 92 97 100 99 99 92 97
KAAVTMPSSKL	91	11	566.823	100 99 95 95 98 94 63 75 98 92 95
VQDYLDDHW	91	9	595.759	59 66 100 100 99 100 100 100 100
MEFVLNKPPVQVYSRHPAED	91	20	786.068	97 99 100 100 79 57 67 79 96 100 99 99 98 96 94 97 98 94 87 92
TEVPEVKVTR	91	10	386.556	81 83 90 99 99 97 97 85 87 94
KNLEFFEAR	91	9	385.205	73 63 90 98 100 100 100 99 99
TVDDSLFKF	91	9	536.272	81 86 100 98 88 77 96 98 98
RVPHDVTKW	91	9	379.878	63 74 92 96 100 100 99 99 99
VAFDKL	91	6	346.702	68 87 100 100 97 96
LSERPALNS	91	9	493.767	99 98 99 82 69 84 95 97 98
FLPKALGPL	91	9	478.302	93 93 99 98 77 75 94 93 98
EMLVETRGSPDASFQ	91	15	833.891	97 92 100 100 100 99 98 76 75 95 83 70 85 100 97
QGPLLLEKW	91	9	542.315	59 70 99 100 100 99 98 98 99
VAFDLK	91	6	346.702	68 84 100 100 98 98
DAGDLRSWTAADMAAQLTKR	91	20	726.365	59 56 79 96 92 79 76 90 99 100 100 100 100 100 100 99 99 99 99 100
KTTVFPPAAVLKL	91	13	462.291	78 85 82 67 84 100 100 99 97 97 99 98 98
KLDDTFDAR	91	9	360.849	82 85 97 97 92 96 94 86 90
HDTALNTHF	91	9	352.501	69 89 93 91 97 94 95 93 98
FVRAPPKVQ	91	9	521.314	99 97 81 83 97 80 85 99 96
TVWLKLPP	91	8	477.295	80 79 89 88 93 99 100 100
MMPSFRDEW	91	9	599.755	99 98 99 96 85 62 82 98 99
FLRGY	91	5	328.182	99 98 90 75 93
MVTLRAL	91	7	402.244	100 100 99 98 71 71 97
LAANAVPAFVSKGALKDAVK	91	20	493.291	92 84 83 56 66 94 100 100 100 100 100 97 94 95 95 96 86 82 98 99
KLGVLGFEVDHEPLML	90	16	599.66	92 90 88 94 100 100 98 100 100 100 99 100 61 62 71 98
ANAVAYNSSDVKDLTADVLKQVK	90	23	817.104	67 71 95 100 100 100 90 57 51 92 99 99 100 100 100 100 100 100 100 100 97 83 90
MEFTCPHS	90	8	476.189	90 98 96 79 77 96 94 97
KEADATLAPSLDLVGLK	90	17	870.99	68 76 75 91 98 100 100 100 94 73 75 99 100 100 99 96 98
KEYFTKYVLDSDE	90	13	818.892	49 81 99 99 97 86 81 92 99 99 99 100 99
TVKPEAGHFA	90	10	528.778	81 82 98 96 96 89 88 85 95 98
TGDPTLHEY	90	9	516.736	78 79 100 99 96 98 77 92 98
TAAVPEAVPTKR	90	12	413.907	68 71 87 97 100 100 99 99 90 88 94 96
ALVGYVDD	90	8	851.415	77 86 99 84 82 99 99 100
KLFDKGGERF	90	10	399.552	97 98 98 96 90 90 90 88 71 87
ALDVTGHAF	90	9	465.738	79 84 99 99 99 97 73 87 99
TLLGLGL	90	7	686.446	63 78 99 98 99 99 99
HDLMMFVRY	90	9	404.528	72 89 96 96 99 99 93 80 91
TGDYYLHEY	90	9	580.749	71 77 100 99 92 96 88 96 97
TFFYGGSRGKR	90	11	319.67	73 77 99 100 100 96 76 79 98 99 100
SDGTYYTWR	90	9	574.754	90 95 100 100 99 94 83 72 82
TACVLLLDKVANLGSLGDQVNVK	90	23	790.775	40 49 80 99 100 100 93 89 90 100 100 99 99 99 99 99 99 100 98 99 99 71 83
GLAGEPLTLRWD	90	12	664.355	62 70 85 96 100 100 100 100 100 99 84 90
ENDLRSWTAADMAAQLTKR	90	19	726.365	63 52 87 79 70 79 91 99 100 100 100 100 100 100 100 100 100 100 100
EMPHSLRYF	90	9	393.859	79 56 86 98 99 99 99 99 99
LNEDLGVSWTAADMAAQLTKR	90	21	764.059	89 84 98 98 80 55 59 67 80 97 100 100 100 100 100 100 99 99 98 99 99
KAGDELKSLYALR	90	13	488.613	100 93 68 84 96 100 99 97 97 93 83 81 85
MEFTCPHSL	90	9	532.731	98 99 99 71 66 97 92 93 98
VNLSSGKVLVEGLNLVK	90	17	885.031	54 63 99 99 99 81 89 100 100 100 100 83 80 96 98 99 100
KHVTLDKPKLV	90	11	320.203	92 80 95 95 92 86 79 92 90 95 98
ALDEAFRY	90	8	492.742	89 93 100 100 96 79 80 88
YLEMG	90	5	612.27	77 85 97 97 96
ESGVGFLVRQ	90	10	546.296	79 70 85 90 97 98 99 97 93 96
ALKALEDGAEWEAK	90	14	765.894	59 81 98 100 100 100 89 72 97 99 97 90 86 96
FGRSLQVTTGAK	90	12	422.238	79 67 73 79 91 98 100 100 100 99 100 100
TLKVLNEKAQ	90	10	381.895	69 78 94 98 96 88 91 94 97 99
SEFLTVARAYP	90	11	627.331	87 96 100 100 100 100 100 99 65 55 93
EQMTGADPVTFAW	90	13	726.823	82 72 95 100 98 97 99 90 73 86 88 96 98
DTPPELNT	90	8	443.712	88 89 99 96 96 92 76 86
KCVPPQLSAEVKL	90	13	471.271	67 49 73 96 97 95 100 100 100 99 99 99 99
EHVKSDLSFSK	90	11	426.222	91 63 84 82 95 95 95 95 95 98 99
KDLGLMDGDLLAVH	90	14	499.598	51 62 72 87 97 98 100 100 100 100 100 100 99 98
SMDLLFEHF	90	9	569.766	82 63 91 90 98 93 97 99 100
TEEALFSKLLR	90	11	436.251	71 71 84 82 99 99 99 98 96 95 96
FAALF	90	5	568.315	71 88 96 99 97
LGQEPLTLRDW	90	11	664.355	66 56 97 100 100 100 96 95 92 95 96
KMAPPQLSAEVLK	90	13	471.271	72 46 85 97 91 88 100 100 99 100 99 99 98
KDWSF	90	5	682.315	91 94 80 93 92
RLEHLVFHF	90	9	399.889	57 66 93 96 100 100 100 100 100
FEMVARPPK	90	9	358.863	59 78 81 99 98 98 99 99 100
EYTQDTELVETRAP	90	14	826.386	67 45 56 97 100 100 100 100 100 100 99 99 100 99
MEFVARPKPVQVYSGVHEPA	90	20	747.724	100 100 100 100 97 95 91 91 97 100 99 99 99 98 61 68 88 96 51 72
KLQHLDFVAR	90	10	613.854	100 100 100 100 100 100 97 88 50 68
RVDSMEHDF	90	9	379.166	62 68 93 98 98 100 95 99 99
EQLVWHSW	90	8	542.764	71 57 98 99 99 97 99 100
LGFDLK	90	6	692.399	97 94 99 98 74 79
KAAAKVLSGKSVLVEVANLVK	90	21	531.834	62 62 71 72 90 98 100 97 82 75 87 100 100 100 100 99 98 98 100 100 99
KMAPPQLSEAVLK	90	13	706.403	98 97 100 100 77 65 93 92 78 74 99 100 100
LQEPLTLRDW	90	10	635.843	56 57 99 100 100 99 98 95 98 98
LAAANVFAPVSGKAL	90	15	714.914	90 95 100 99 98 99 88 79 79 98 97 90 61 77 99
ALLDFFLKRS	90	10	403.904	88 93 98 100 100 100 99 79 57 86
ALDAAKFHF	90	9	340.515	62 63 97 97 97 97 97 99 100
HGDNTCPHSLSYQEVDDTQFVRF	90	23	674.554	92 57 82 74 66 59 90 98 99 98 97 97 86 93 99 100 99 96 96 98 99 94 97
KTEVPTTVYPAK	90	12	667.372	99 98 99 76 52 61 96 99 100 99 99 99
FAAVLVKAAEAAKAQ	90	15	744.433	61 66 79 91 100 100 100 100 97 98 100 100 93 71 92
LFDLK	90	5	318.191	99 97 94 85 74
LALHEVEEW	90	9	563.284	92 79 85 69 93 92 98 100 100
TLLHPLAMDDLGR	90	13	484.594	93 93 98 95 99 100 100 100 100 99 59 41 92
VLPVPQ	90	6	326.704	62 81 99 100 100 97
SWTL	89	4	506.262	83 80 98 98
TGFGKAW	89	7	383.697	88 88 99 94 82 84 93
TYFGDDYSLSYFYTAVSRDP	89	20	789.687	61 67 86 81 78 70 79 99 100 100 100 100 100 100 100 100 99 98 90 88
LSVGPKLVKWDRDH	89	14	550.643	75 59 69 80 99 100 100 100 100 99 98 96 92 89
WQREGQDQSQDMELVETRPS	89	20	807.037	87 57 79 88 73 67 78 85 100 100 100 100 100 100 100 100 100 100 89 93
YYTEFTPTKE	89	10	639.798	88 95 99 100 99 99 93 71 68 85
KEKVTPNVAEAVKNAKA	89	17	450.011	70 56 51 85 99 99 98 100 100 100 100 99 99 91 93 89 95
TVDGHVHDF	89	9	513.736	89 85 98 69 72 99 97 99 98
AGDPLSHHF	89	9	327.491	59 61 95 100 100 98 97 99 99
VSRPGL	89	6	314.692	99 99 99 71 70 99
KVNDEGLLETMKE	89	13	753.384	100 99 96 95 100 97 98 99 99 65 34 89 95
VLDLQKHYQ	89	9	572.311	79 81 96 91 95 97 88 87 90
SNKGLKLPPLSNN	89	13	691.396	65 52 69 82 98 100 100 100 99 99 100 100 100
KTPPAAVLLK	89	10	519.34	99 99 100 96 76 57 69 99 100 100
FTFVTKTPAPAVLL	89	14	752.942	63 67 88 90 99 98 99 96 89 74 92 99 100 100
FGSDVQWEHF	89	10	626.276	63 63 85 99 96 90 99 100 99 100
TLLHPLAMDDLGR	89	13	484.594	99 98 99 97 100 100 100 99 99 98 51 40 85
GYYNQSEAGSH	89	11	606.749	79 83 99 73 66 96 98 98 98 99 96
TMDPHLSVY	89	9	531.75	71 65 96 98 83 95 97 100 100
KPLKVKWDRDH	89	11	356.207	93 71 82 82 99 100 100 98 67 91 100
KDNAQTYGVGLN	89	12	640.318	82 82 68 70 74 98 100 100 100 100 100 100
VADLDAWHF	89	9	537.257	51 63 99 98 98 97 99 99 100
DMAAQLTK	89	8	439.226	88 79 100 98 95 97 80 79
AAKDVKFGNDLGRKML	89	16	441.497	69 86 89 96 99 100 100 99 99 100 97 51 59 96 93 97
LNEDSLR	89	7	423.72	96 95 99 98 92 68 79
PYGLVGK	89	7	367.219	59 72 98 99 100 99 99
KLLFENLTPLHLELW	89	15	467.271	84 96 100 99 97 76 86 100 100 100 98 97 61 54 92
ALDWLHSGF	89	9	523.259	82 86 100 99 98 69 79 95 95
KTKSWTLVR	89	9	373.561	48 78 89 97 97 98 99 99 99
LADLASSHF	89	9	480.743	67 65 97 97 95 95 95 94 99
ELFLDPNK	89	8	488.261	86 79 86 97 99 99 82 86
TDQFVRFD	89	8	514.247	62 69 96 99 99 97 94 98
GYARGGF	89	7	364.179	82 85 99 97 78 84 99
TAWPVKVAAG	89	10	500.286	79 72 84 86 93 95 99 98 92 93
KVPDAAASTGKLF	89	13	652.864	100 100 98 89 72 62 59 85 99 99 99 100 100
FDLF	89	4	541.265	80 79 99 99
RGGFLVPQGKAVPATK	89	16	542.654	63 48 62 90 99 99 98 95 86 91 98 98 99 100 100 100
TLLFEVLEATAQDALVFW	89	18	689.372	79 77 84 85 92 92 98 100 100 99 99 97 98 61 61 90 94 97
EMPRVPWLQQE	89	11	706.854	98 88 72 61 85 90 95 99 95 98 100
LTPMLLQELAQTK	89	13	495.951	98 77 66 50 83 97 99 100 100 99 96 96 98
MMDSDFDHF	89	9	572.708	99 99 100 71 49 86 99 99 100
EPTLHVKV	89	8	461.773	89 62 82 93 92 96 99 99
YGVDDTQFVSHGPGP	89	15	788.36	70 75 96 100 100 99 99 100 100 85 51 69 96 97 98
VLETRSDPGGTFQ	89	13	703.849	93 92 99 97 94 74 76 70 78 89 96 100 99
KMLVLDKHPLVKH	89	13	779.467	88 85 100 100 69 62 97 98 81 79 98 100 100
RYLKPVPW	89	8	353.543	68 76 95 89 85 100 100 100
TVKKKLLGLGL	89	11	585.397	76 75 88 91 94 99 94 86 84 95 96
TNLFVSR	89	7	418.735	98 90 98 98 95 68 76
MGPHSLSY	89	8	446.205	90 59 82 90 94 97 100 100
RVPWLQQEGQDYWDEETR	89	18	779.033	63 56 56 78 93 82 82 100 100 98 99 99 99 100 100 99 99 96
TFFYGSGR	89	8	467.725	100 100 100 100 97 63 57 95
ELDHYASEF	89	9	555.741	91 70 83 72 95 94 96 99 100
TVWLKLPP	89	8	477.295	72 72 86 88 94 99 100 100
MGDAGLVHSW	89	10	536.748	98 77 79 65 78 95 100 99 100 100
FGKMPF	89	6	363.685	67 74 99 99 98 97
MEFVAGVPPKVQVYSRHPAED	89	21	786.068	100 100 100 96 52 31 57 73 73 94 100 99 100 100 99 99 99 99 99 98 98
FGDRTTFVTKTPPAAVLLK	89	19	516.299	78 61 56 32 66 99 100 100 99 99 100 100 100 100 100 100 100 100 100
QHLDFVAR	89	8	329.178	62 69 100 100 99 97 90 94
KVALDLVFRVP	89	11	628.892	54 56 88 100 100 99 93 95 97 98 98
KTEVPTTVYPAKTQ	89	14	781.924	96 84 93 69 51 70 90 98 100 98 99 100 99 96
RLAGDAEHW	89	9	352.173	62 78 91 93 96 94 98 90 96
RFNLPGSK	89	8	306.844	62 63 86 99 100 100 100 100
DPFEDNQSLSYFYTAVSRDP	88	20	784.355	63 49 76 84 79 70 80 98 100 100 100 100 100 100 100 100 100 99 90 88
KADSLLHQF	88	9	353.526	73 65 86 90 97 100 99 96 94
QQWAVPWLQQEGQDYWDEETR	88	21	898.076	40 37 46 59 91 99 100 100 100 100 100 100 100 100 100 100 100 100 100 97 98
KGVLSSVEGLNLVKK	88	15	524.323	82 66 77 67 68 90 100 100 97 95 97 97 99 100 100
KPLVKKWDHDR	88	11	356.205	88 73 81 75 89 99 99 98 83 95 97
FVARPKPVQVY	88	11	652.38	90 88 94 95 93 81 72 82 81 99 100
LAMHDKAVF	88	9	516.271	75 76 93 89 89 85 92 100 100
EDQRLSDSY	88	9	556.746	86 63 68 87 96 98 100 100 100
FGVSLGPKLLK	88	11	386.916	86 62 73 76 90 94 99 100 100 99 98
TLLGLGLHPLKLP	88	13	686.445	98 92 93 86 95 86 74 40 95 99 99 98 98
QADLEREYP	88	9	560.768	63 89 100 100 99 74 85 94 95
TQFHVPWLQQEGQDYWDEETRKV	88	23	973.795	37 38 54 55 93 96 98 99 92 91 100 100 99 100 100 100 100 100 100 100 99 93 97
ALPSLDLVGKL	88	11	563.348	92 92 98 92 81 79 87 81 78 97 99
TAVNQLVRKP	88	10	375.896	79 74 86 97 95 99 98 70 86 100
VAVESLQ	88	7	745.41	82 74 78 89 99 100 98
HCGQDYWDEETRKV	88	14	883.386	50 71 74 81 100 100 100 100 100 100 97 96 82 90
MFLKTE	88	6	384.701	97 98 98 87 61 89
KPLVGSLVKWDRDH	88	14	330.788	79 80 94 90 70 68 78 96 99 98 95 93 99 99
FMGPHSLS	88	8	438.208	100 100 100 100 79 65 68 97
VLPVPQ	88	6	326.704	60 78 99 100 99 96
RNFLVPQGK	88	9	353.541	52 57 91 99 100 100 98 99 100
QLPPGFKMPF	88	10	581.311	49 82 100 100 90 87 91 98 96 92
VAFDKL	88	6	346.702	65 81 100 99 93 94
RGGFLVPQKGAVPATK	88	16	407.243	66 54 71 95 100 100 99 93 80 70 93 97 98 99 100 100
TVENSLFPF	88	9	527.267	92 79 83 68 82 96 99 97 97
MPFPK	88	5	619.328	83 90 96 86 86
TGSLYLLRSAGP	88	12	617.843	54 51 79 99 100 100 100 97 92 97 97 95
LADPHVVHW	88	9	358.522	66 51 82 99 99 100 100 99 99
ATDFNATASY	88	10	530.732	97 97 100 99 97 63 56 74 100 100
KLEEQWHPF	88	9	405.205	80 82 92 87 68 96 96 97 96
YSPEKL	88	6	368.697	97 96 95 95 68 79
FDLF	88	4	541.265	78 77 99 99
FLSNLKW	88	7	454.256	99 96 82 59 91 95 97
KTFARADEVVTR	88	12	464.925	100 97 67 49 62 99 100 100 100 95 93 98
RLAFDQMHF	88	9	388.859	74 80 94 96 92 76 95 90 97
PDFYARPPKVQVY	88	13	790.419	52 74 91 98 100 99 95 79 77 84 98 100 100
VFEGSLTDLNPAKP	88	14	744.392	91 91 99 92 90 96 97 98 96 82 75 51 77 99
FGTFKVNH	88	8	317.168	84 43 82 100 100 100 99 99
KWEAANVAERR	88	11	443.907	100 99 100 98 95 70 65 63 82 99 99
EMYMGPHSLSYF	88	12	731.316	90 71 93 88 96 91 55 82 93 99 100 100
EGMAAQLTKR	88	10	368.866	63 51 79 100 100 99 99 97 96 98
NRVTKAPEAGHFA	88	13	350.187	50 56 86 95 97 98 99 99 99 98 96 85 89
EVLPSFTVDHTR	88	12	467.577	89 78 84 77 83 84 98 97 99 90 91 88
ESALKLLNNLSVAL	88	14	742.945	90 93 100 100 100 100 100 96 83 87 50 51 89 96
EDRVEVTVKRLK	88	12	368.721	86 61 54 69 96 99 99 99 99 99 99 99
KDLANDPPTHKQVTTGAK	88	18	641.011	98 100 100 99 80 98 95 97 91 44 45 82 68 99 99 97 98 99
KVEDAGFSHF	88	10	568.773	99 95 98 99 73 49 70 99 100 100
VPGENPQNTLFALK	88	14	764.412	65 52 70 85 92 93 90 92 96 99 99 99 100 100
MTADAVKQVEEMAL	88	14	768.377	85 86 91 90 90 93 57 57 91 98 99 98 99 98
YFQGKAVVESLRQ	88	13	762.91	92 94 98 99 99 100 100 100 98 50 50 73 92
VAPYPQ	88	6	337.679	60 71 99 100 100 100
TGDLQASHY	88	9	496.228	83 79 99 99 96 97 79 61 99
KSVEELLGK	88	9	501.795	99 90 91 73 76 95 97 82 90
ELDLFPVHW	88	9	578.296	69 60 84 89 99 97 98 98 99
KLDSLLVKY	88	9	360.221	77 54 77 92 99 100 99 97 97
KSLVVALERF	88	10	387.904	59 56 82 99 100 100 99 98 94 93
WLLPPLSNN	88	9	527.29	44 60 95 100 99 97 99 99 100
LTDWDDDDPLASSSLVTEWVGK	88	22	817.052	39 29 55 72 90 95 96 95 94 99 100 100 100 100 100 100 99 100 99 100 86 90
LNVTLPEAEEKL	88	12	678.376	41 62 100 100 100 87 82 96 97 93 98 99
AVFDKLK	88	7	410.75	69 71 96 95 88 98 99
LTLHPLAMDDRKYP	88	14	835.44	98 97 100 100 100 100 100 97 99 99 67 43 44 90
LALDFFKRVT	88	10	403.904	85 80 94 100 100 99 98 91 59 73
NLEFFEAR	88	8	513.256	46 67 100 100 98 98 98 97
KTTVPPAAVLLKKAALGK	88	18	452.295	82 82 90 94 99 97 94 96 99 100 100 100 99 99 80 39 35 95
TECATAAQLTKR	88	12	431.559	95 60 56 66 90 100 100 98 99 97 96 99
TALAWTAADMAAQLTKR	88	17	455.496	77 46 67 66 70 85 100 100 100 100 100 100 99 100 95 95 95
FGAF	88	4	441.213	98 61 93 99
KLLDEPAAFEAP	88	12	650.846	100 100 100 100 99 68 60 65 70 97 97 98
KLFTEYR	88	7	319.511	73 76 85 88 99 98 97
LSWF	87	4	552.28	92 81 85 93
VLPQGKAVPATK	87	12	403.583	95 91 91 83 49 60 92 95 98 99 100 100
HQDTHLHDW	87	9	396.844	54 56 89 95 98 100 99 100 100
LSKGVTNPVAEAVKNAKAGQVRY	87	23	600.839	41 48 73 83 97 99 92 90 99 100 99 95 97 100 98 99 99 99 67 61 92 93 97
EADVDVFCVGLNNKK	87	15	550.945	91 66 84 76 73 66 95 90 95 96 97 95 95 98 98
KLLSWLPPLSNN	87	12	691.396	90 95 67 38 67 100 100 99 99 100 100 100
VGALLRAT	87	8	400.753	98 99 100 100 98 86 51 70
VAPFPEV	87	7	379.708	57 67 90 100 100 100 100
KPLKVKWDEAAH	87	12	356.206	91 77 82 63 97 99 93 93 75 95 90 96
TLDVFDHY	87	8	505.235	93 86 85 67 93 96 85 96
ELDKTEFPF	87	9	563.28	94 80 84 72 84 95 89 95 94
TALLGLVAR	87	9	457.295	95 96 100 100 96 94 60 55 94
EVKVANLGSLGDQVNVK	87	17	885.492	68 56 86 100 100 100 100 97 86 86 52 74 95 96 97 98 99
FGTFKVNH	87	8	475.248	94 71 94 96 99 99 75 72
KLSEDAEHF	87	9	538.256	100 99 73 61 65 95 99 99 99
KFVVGGSDEVVRTK	87	14	380.969	95 89 92 79 54 49 74 99 100 100 100 99 99 99
ESGPHVMKEALAAP	87	14	479.579	82 69 69 65 67 95 93 98 98 97 98 98 98 99
LADSAELTAVKSELVNVAK	87	19	653.366	99 95 82 65 72 84 76 98 99 98 98 94 88 79 88 73 79 98 98
KVRTLLNEKAGA	87	12	433.93	51 51 67 92 99 100 100 100 98 98 99 97
MEFVARPKPV	87	10	391.886	49 81 98 99 99 98 98 76 79 99
LALDFFLSRK	87	10	605.354	98 98 100 100 100 100 99 85 35 61
TAPLLQEHF	87	9	528.281	95 86 71 88 80 83 95 92 98
EDGTKLPLTAR	87	11	400.89	82 68 59 71 92 99 100 100 97 98 98
KNGSLKLPPLSNN	87	13	691.396	61 46 60 82 91 99 100 100 99 99 100 100 100
LSLEAE	87	6	661.341	86 93 98 85 73 89
AADVHDTEF	87	9	502.72	80 79 91 85 72 91 90 98 99
MEFVARPKPVQVYS	87	14	825.938	77 97 100 99 98 100 92 69 56 68 79 95 97 96
MERPVPWLQQEGQDYWDEETRKV	87	23	730.601	95 96 78 62 81 90 97 99 82 78 98 55 49 98 99 99 100 100 99 95 92 78 91
EHGLAGEPLTLRDW	87	14	531.94	83 59 88 90 68 61 91 100 100 99 95 93 97 99
GHDYLYEHY	87	9	598.754	71 73 100 88 80 90 97 90 96
PQQLLSGNEKVVRPR	87	15	431.001	56 57 83 99 100 100 99 82 91 78 93 93 90 93 95
MSYGESACCEGPDGLLLRYG	87	20	1060.96	67 85 96 98 96 73 38 60 90 97 99 99 99 95 98 100 100 87 83 88
EMPRVPWLQQE	87	11	706.854	97 80 57 51 89 95 97 99 97 97 99
KMPF	87	4	522.274	92 77 93 86
KVDPVYAYH	87	9	364.522	82 82 96 96 95 90 77 84 82
GYVDDTQFVRDF	87	12	731.337	73 87 100 100 100 98 97 99 99 86 50 59
ESAGFVRF	87	8	456.733	83 68 73 76 99 99 99 100
LVGVGRY	87	7	382.227	99 100 100 96 51 67 99
EMFMGPHSLS	87	10	568.25	86 73 99 99 99 97 68 73 81 97
LADF	87	4	465.234	91 76 94 88
SLYVETHDW	87	9	575.265	66 80 100 99 99 98 56 88 100
TFFVTKTPPAAVLLK	87	15	544.997	85 77 83 79 85 96 100 100 99 92 50 66 95 100 100
VRYADEVVTR	87	10	403.221	61 63 86 93 99 100 100 95 83 92
EAGGQSDLSFSK	87	12	613.29	91 75 72 69 93 92 92 90 90 91 93 96
FGPLAYVGDVVGYEVP	87	16	841.432	73 69 88 96 100 100 100 98 97 97 96 48 55 95 93 90
FLVPQGKAVPATK	87	13	452.606	85 94 100 97 93 56 59 90 92 89 90 94 92
AVDALLDPNELLNSLAAVKSGTKA	87	24	804.113	48 45 78 94 98 99 98 66 52 85 100 97 91 95 97 99 99 99 99 98 96 93 79 88
TAVNQLVR	87	8	450.767	92 86 98 86 79 93 77 83
VDDTVVGGPALTLGTAELVETAKR	87	24	804.772	90 79 89 87 94 95 86 85 88 87 74 49 50 60 99 100 100 100 99 99 95 93 94 98
EHCQESAGAEPDNAP	87	15	518.874	82 41 67 68 86 98 100 99 99 99 96 97 90 89 95
RGGVLADAVKVTLGKPGR	87	18	449.271	61 56 75 95 100 100 97 73 84 100 100 100 100 99 74 61 95 98
KQDTLWKTW	87	9	402.548	74 50 84 89 95 98 97 98 100
ALLDFFLSRK	87	10	605.354	96 99 100 100 100 99 97 81 37 62
LLFSPHARP	87	9	346.535	41 67 95 98 98 97 98 94 96
NEDRLSWTAADMSAQLTKR	87	19	731.696	49 76 93 66 59 72 95 99 100 100 100 76 76 99 98 99 99 99 99
NTQDMELVETRSP	87	13	760.356	37 34 67 99 99 100 100 99 99 99 99 100 99
PLEDVLLFS	87	9	516.785	52 65 90 95 95 98 95 96 97
TNDQLFHPF	87	9	559.767	88 71 86 65 79 98 98 99 99
GLRPPKVQVY	87	10	578.847	54 86 98 97 79 75 84 96 100 100
FHLPTVAATKE	87	11	405.224	65 40 76 85 98 100 100 100 100 98 95
QKLKTLGLEAR	87	11	419.594	52 51 83 99 99 99 97 98 99 91 87
VGVTNEMQVVLTKP	87	14	757.917	67 73 93 90 73 97 68 84 91 96 95 96 96 98
TSDLTYHEY	87	9	564.746	84 86 99 99 83 77 65 90 98
ECDSCG	87	6	307.083	100 74 79 71 98 99
KLDFGGSHVY	87	10	561.784	97 92 83 59 52 86 100 100 100 100
FKKDWTFERL	87	10	457.247	80 54 68 96 97 99 99 96 85 95
KGYRDRT	87	7	448.244	100 92 92 89 93 63 77
HQLKLDFVRA	87	10	409.572	46 52 90 99 100 100 98 95 92 95
SWLLKLPPLSNN	87	12	691.396	37 38 73 98 100 100 100 99 98 100 100 100
KLPEGSPKF	86	9	334.858	92 90 89 88 70 78 95 91 89
ELRVPELGEEVLELK	86	15	584.996	51 40 56 85 79 95 100 100 100 100 99 100 99 99 98
EELEL	86	5	632.314	83 78 79 99 95
PNPVDVAVAW	86	10	534.28	72 62 75 89 98 93 88 90 99 100
ALEVLYVSGF	86	10	549.299	79 83 100 99 99 90 65 60 94 99
EFMVARPPK	86	9	358.863	77 61 69 98 96 96 95 93 95
SSLLEKGLDQK	86	11	406.562	62 60 80 96 99 98 89 90 92 90 95
QDTGALFHF	86	9	518.25	88 96 82 59 60 98 99 100 100
TVRFGPKL	86	8	459.281	79 69 75 86 94 92 98 100
VAGGLGSLGDQVNVK	86	15	707.389	77 76 85 90 100 100 100 99 92 83 82 94 59 66 98
KVEVANLGSLGDQVNVK	86	17	590.664	60 45 67 66 71 79 91 100 100 100 100 100 99 99 99 99 99
EVVKLLAHLSK	86	11	412.927	78 63 70 71 88 99 98 94 96 97 98
QGAEGLQWDYWDEETRKV	86	18	737.344	44 44 71 91 87 70 88 97 99 98 99 100 100 100 97 96 86 92
RFLPNLHSH	86	9	374.205	67 70 89 75 82 100 99 100 98
MFCGFVARPKPVQVY	86	15	871.446	43 44 61 90 100 100 100 100 97 89 85 93 97 99 100
MEFDLTPKVQVY	86	12	735.373	54 88 93 97 99 100 98 66 52 92 99 100
PPFLQVVPE	86	9	513.288	71 59 77 82 90 99 100 99 100
KVNDEGLLEDARF	86	13	502.592	74 60 69 82 90 93 99 100 100 99 89 78 90
EDVSGKMQRVP	86	11	623.318	73 57 71 99 97 96 95 92 83 90 95
ESALKLL	86	7	387.241	79 68 83 82 94 98 99
LRLLTKPE	86	8	323.874	46 68 93 94 98 98 96 97
TVKVVALER	86	9	338.881	49 49 82 99 100 100 100 100 99
TFFYGSLVW	86	9	373.857	84 85 97 100 97 86 91 46 91
EVLKDADHF	86	9	358.514	74 61 84 99 98 95 96 76 94
MEWRL	86	5	367.684	83 92 88 79 89
WAKFGLFVR	86	9	375.219	76 72 79 77 76 99 99 99 98
LNLLLDKVANLGSLGDQVNVK	86	21	741.763	43 55 97 99 91 80 77 98 98 91 96 98 98 98 93 94 89 96 93 52 74
QDASGNAQETDQVVDAEFEEVKDKK	86	25	695.827	52 80 95 93 69 43 37 51 93 93 94 67 93 100 100 100 100 100 100 100 100 99 100 99 99
TADPYPHYY	86	9	563.746	70 66 82 93 95 94 84 93 99
MEFVARPPKVQ	86	11	434.574	51 86 99 99 97 97 97 72 62 96 91
ESGSYYTWRVSK	86	12	731.854	79 67 79 93 99 98 97 94 92 67 72 98
RPPKVQ	86	6	362.727	97 69 71 82 99 97
ALLDFFKLSR	86	10	403.906	86 92 100 100 100 100 94 68 54 68
TGGLLGDAEWEAK	86	13	449.558	62 49 61 78 89 86 97 100 100 99 99 100 100
LTVSW	86	5	605.33	67 73 92 100 99
FSGL	86	4	423.222	86 75 92 92
SQDTLLDHY	86	9	546.253	44 50 98 97 97 98 98 96 98
TPVTETVYPAKFVVPSP	86	17	611.335	66 57 68 60 76 98 99 100 99 99 100 99 97 92 89 78 86
KSWTLVALLGE	86	11	608.856	100 99 99 99 98 93 92 63 55 54 94
KPGLPLTLRW	86	10	394.245	85 63 56 72 97 99 99 98 93 97
FNLVKGPAG	86	9	451.758	48 55 99 100 99 97 93 88 95
NGDHVARPPK	86	10	364.195	50 49 82 84 99 99 99 99 99 99
TLLPW	86	5	629.367	66 78 91 98 97
TKETPVTVYPAKTQRLQ	86	17	654.034	52 51 85 91 89 95 99 100 100 100 100 100 97 89 52 67 95
TLVVDKGELKV	86	11	400.912	79 86 100 100 99 48 41 96 99 99 99
RVPWLQQENADYWDEETRKV	86	20	641.316	72 66 80 94 97 82 78 98 75 77 99 100 100 100 100 99 90 56 68 89
LNEDLRWPAT	86	10	607.812	99 99 100 100 100 99 86 51 56 70
DYWDEETRKV	86	10	670.81	91 77 100 100 100 99 92 56 61 83
EQAVPLTLRDW	86	11	664.355	90 61 75 83 98 98 94 91 82 74 96
SLVETHEHW	86	9	379.849	84 75 59 69 95 93 99 99 100
KLVKWDSSPMLE	86	12	716.885	100 100 100 100 100 99 59 48 46 79 100 100
LAAVVPCCCENQQESFQ	86	17	934.906	89 78 90 98 100 100 100 96 89 85 51 41 84 94 85 84 94
LLHPLAMDDYKGVP	86	14	784.917	96 99 100 100 99 98 92 97 98 45 34 48 97 98
YFQGKAVVE	86	9	520.775	99 96 76 75 60 76 91 100 100
KLQLVGV	86	7	378.753	82 66 67 89 97 100 100
VAPKLPTL	86	8	419.773	51 71 99 99 90 79 98 98
YVGAKLPADVLRP	86	13	466.942	65 55 57 67 88 97 100 99 100 98 97 97 95
PLEDVLLFS	86	9	516.785	59 68 90 93 94 96 88 89 95
KRLLPDPKFGDTLLAK	85	16	453.774	79 75 90 90 76 89 97 99 99 94 55 37 91 100 100 100
YADEVVRT	85	8	476.74	97 98 100 99 96 89 41 66
TVGALAAVEKAY	85	12	398.224	62 51 60 76 94 98 99 99 99 96 97 97
SLDEHDDPF	85	9	537.722	73 88 97 98 90 72 63 90 98
TLAGPVTKDF	85	10	524.787	82 63 60 68 97 95 96 97 99 99
TPCPGSLH	85	8	406.19	75 56 80 94 94 95 96 95
QSGADMELVETRGDPS	85	16	846.379	46 51 65 79 100 100 100 100 99 100 99 98 97 98 57 83
MFTLNEAVR	85	9	540.78	94 99 100 100 95 57 55 82 89
ESAAAVFPTAAQLTKR	85	16	415.985	77 67 89 97 91 57 44 55 100 100 100 99 99 99 99 99
LGKAPGFGDR	85	10	339.854	45 44 82 100 99 98 98 95 98 99
VKGSLVEGLNLVKK	85	14	495.312	57 49 57 73 93 99 100 90 88 97 98 99 100 100
FEFMGPHSLSYFYTLPSNDVAAW	85	23	670.556	100 100 100 99 100 100 100 100 100 100 100 100 100 99 71 34 37 41 78 56 75 82 98
NPPGDYEEHDGLPNPVDVAW	85	20	1110.99	35 44 83 84 75 63 90 98 95 97 92 97 99 96 76 88 100 100 100 100
MLDFKLPHF	85	9	383.204	34 60 89 92 99 100 99 97 98
FGAY	85	4	457.208	99 57 88 98
ALVADKYFAK	85	10	375.881	44 54 76 99 95 90 99 100 100 100
FTARADEVKVTR	85	12	464.924	60 50 61 72 92 100 100 100 100 98 97 97
VDLGTLHAAP	85	10	497.272	96 99 99 99 95 71 39 63 96 97
KSPAAHLTSVGYTQAGGPQ	85	19	935.476	94 48 49 60 68 62 97 86 90 97 99 100 100 99 98 95 92 97 95
HLPLPL	85	6	345.221	51 75 90 98 99 98
WADDEEQHEGLQEPLTLRWD	85	20	823.043	40 40 67 82 82 81 78 97 99 98 99 100 100 100 100 100 98 94 67 86
TVMFHTNHGD	85	10	386.838	79 61 71 88 96 92 82 90 96 98
ALDPLPEHF	85	9	519.767	72 78 99 98 96 90 82 57 95
KAVVEFVLVDP	85	11	608.355	100 100 100 100 100 73 48 57 71 95 97
SNLLKQL	85	7	408.253	57 57 97 100 98 95 93
EPPLEKKVPKLVKWDRDH	85	18	443.656	97 93 98 95 76 51 54 59 62 82 99 99 96 93 97 92 97 95
QQPVALKLADEGAEFFY	85	17	642.66	50 59 85 82 73 97 86 96 95 81 82 90 92 95 92 95 99
KHVPLYGKFLK	85	11	333.206	73 44 73 71 94 100 92 92 100 100 100
ALDWELGHW	85	9	563.77	59 62 96 89 91 94 93 89 96
KTKSWTLVRVVE	85	12	482.621	38 59 74 95 95 98 99 99 93 79 96 99
TQLLDVLAEKAELSKTQA	85	18	653.366	48 55 92 97 81 84 99 99 99 98 97 99 98 99 99 95 40 57
KAAKFALNLK	85	10	368.569	78 70 67 63 93 95 96 92 98 100
AMEDL	85	5	578.249	65 65 98 100 100
TVKDAELAEVLAR	85	13	472.269	66 59 62 69 66 95 100 100 100 100 99 98 97
LNEDLRP	85	7	428.731	86 81 91 91 84 74 90
KPPRAVVQVYSR	85	12	350.709	78 77 78 54 60 87 99 97 98 99 99 98
PAAGFAANVAERR	85	13	333.181	38 61 76 77 90 96 92 90 92 97 99 100 100
TVWLKLPP	85	8	477.295	84 78 79 66 75 98 100 100
FGGGKSVKLLSPHVNK	85	16	417.745	92 78 60 31 41 76 94 92 98 100 100 100 100 100 100 100
KAVVESLQRVDKLGP	85	15	410.497	76 82 96 100 100 100 100 97 94 88 44 33 86 89 91
FGPVAWTAADMAAQLTKR	85	18	645.335	73 63 66 48 44 59 87 98 100 100 100 100 100 98 99 98 99 99
WPGLVTAADTAAQLTKR	85	17	450.504	77 60 56 62 77 90 89 95 95 97 99 99 97 99 90 71 93
GYVDDTQVFVGFDNYAPNYNHVP	85	23	877.738	95 98 100 100 96 90 95 93 94 78 71 78 98 99 99 100 99 97 50 44 32 69 80
KSSVPQ	85	6	645.356	62 73 88 97 97 93
TFFYKMSVP	85	9	560.283	97 97 100 99 91 35 55 95 97
SNGTYARPPK	85	10	364.195	49 48 68 92 96 99 99 100 100 99
QVKVPQTGSDLLVKPAVKA	85	19	660.061	32 34 72 94 71 73 97 98 98 99 100 100 100 99 94 75 89 94 96
VKGSSLVGKGKVLVEGLNLVKK	85	22	451.288	86 73 79 89 97 98 95 71 52 39 45 57 92 100 100 100 99 99 100 100 99 99
EHKPHLLDAGAK	85	12	439.242	59 25 65 94 100 100 96 93 95 96 99 100
KPLKDVKWDRDH	85	12	384.963	80 69 74 49 61 94 99 100 99 96 99 98
KVEDFQSHF	85	9	379.518	79 73 90 92 77 63 97 95 98
FPAVPEV	85	7	379.708	61 57 86 93 99 99 99
FPGARTPKLQ	85	10	557.824	73 60 67 77 91 95 91 98 100 98
WYDEETRVK	85	9	409.2	67 79 100 100 99 81 72 76 91
VLAAVEPPGEQESYCCCAHVQHE	85	23	833.703	72 77 89 96 100 100 100 88 82 92 93 94 91 96 78 52 44 61 96 99 97 63 92
LGGELLEFPTPFTYK	85	15	856.451	75 54 71 97 100 100 100 100 98 97 46 52 93 94 96
SLGVKTPNVAEAVKNAKAKSGPA	85	23	560.074	44 41 56 78 93 99 90 84 90 96 95 97 99 99 97 98 99 99 88 95 92 50 73
SGDYLKHTW	85	9	553.766	57 51 81 85 99 98 96 98 99
TFFYGGSRG	85	9	496.236	99 100 100 100 99 76 55 44 92
KDGQQTYGVGLNTLR	85	15	550.626	75 79 62 56 61 76 98 100 100 100 100 96 87 91 92
EHAAPGGLGNLMK	85	13	647.837	80 40 71 71 78 98 93 92 88 93 99 100 99
EPVFPAVGF	85	9	481.753	62 44 74 92 95 100 100 98 98
ECDSCG	85	6	307.083	100 73 77 66 96 97
RFEDGKFFVVGK	85	12	357.949	79 84 97 98 87 73 93 90 68 95 70 83
KGSVSLNVLVEGLNLVK	85	17	590.357	81 75 82 74 82 92 82 98 99 99 99 48 49 88 95 98 99
VSGGGAQTYGVGLNTLR	85	17	550.626	68 67 79 71 51 51 69 97 100 100 100 100 99 95 97 99 99
PFQRTPKLQVY	85	11	688.89	30 38 90 88 95 96 98 99 99 100 100
EYELGKLDLFVRVP	85	14	839.466	83 79 96 97 63 67 97 98 97 62 65 96 96 91
RVGYADEVVRTKE	85	13	381.205	72 62 74 86 83 89 93 99 95 84 78 89 97
YNDFAP	84	6	726.311	62 59 94 96 98 99
LFPMLYGAVQPKGAVPATKK	84	20	424.046	90 59 46 34 79 97 96 89 79 77 66 91 94 99 100 100 100 100 100 100
ESLKWAADMAAQLTKR	84	16	606.993	79 60 60 44 54 83 89 97 100 100 100 99 99 98 98 97
FTFYGGSRGK	84	10	373.857	90 82 97 100 100 97 60 48 86 88
EDPDELQDK	84	9	544.741	70 69 75 99 97 94 81 89 88
FDGALHDKY	84	9	355.838	50 56 62 95 100 100 100 100 100
VQGSLGDQVNVKAGYA	84	16	803.415	45 56 91 98 100 100 100 99 100 100 100 81 59 87 59 79
KPLKVKWDDRH	84	11	356.205	88 78 90 89 99 99 99 95 56 49 90
KSGPTKPEAGHFA	84	13	442.902	61 43 44 62 95 99 100 100 100 100 100 99 99
THLGNEMLA	84	9	493.242	92 79 91 67 55 85 93 99 99
NEDRLSWTAADMSAQLTKR	84	19	731.696	45 62 78 54 55 70 94 97 99 100 100 82 82 99 97 99 98 98 98
KSTEKVRYTQANAGP	84	15	825.434	98 51 55 68 63 79 99 100 99 95 92 92 92 91 94
SVVPDSLLEKAVDQK	84	15	407.731	86 93 97 59 68 50 88 91 99 98 88 84 86 87 93
LQLVGVAHAP	84	10	502.798	97 94 100 100 98 96 65 27 81 89
LSTGTPVTVYPAKTQ	84	15	521.619	43 50 76 73 71 69 90 98 100 100 100 100 100 100 99
ALHEDGVFHF	84	10	391.193	85 93 99 100 99 59 49 67 97 99
NFKTEEYSCDC	84	11	669.752	67 77 93 94 98 100 100 98 52 56 95
KGSVLVEGLNLVK	84	13	452.613	69 43 61 81 97 99 100 99 98 91 88 85 86
MMDWSGHEVP	84	10	594.744	100 100 100 97 92 52 37 74 96 98
SLYATWKVLK	84	10	604.855	95 98 100 97 59 54 63 79 100 100
PPSSHGGLGNLMKQAQQMQEKMQ	84	23	842.411	80 49 71 88 96 91 56 52 50 68 99 100 100 100 100 99 99 100 100 100 100 66 79
ECDSCG	84	6	307.084	99 71 76 66 96 97
KDLALGEEFVNK	84	12	454.914	41 51 56 81 97 99 99 100 99 98 96 94
SAFGFKVNH	84	9	336.174	55 54 73 83 99 100 100 99 98
FNLMLETK	84	8	498.265	95 76 90 79 94 96 69 76
TLRGYYNQSE	84	10	615.79	91 83 65 56 77 86 88 98 100 100
TAAFLGPKLKLSR	84	13	351.223	65 68 83 82 67 61 82 99 100 99 98 97 96
TADHMLVPW	84	9	535.261	84 60 74 60 86 97 99 100 99
TLLGLAVR	84	8	421.776	98 97 99 95 93 52 46 92
KPLVGHAVKWDHRD	84	14	415.232	87 86 96 91 57 27 54 98 99 99 99 92 96 99
TVSATPVTVYPAK	84	13	445.25	69 46 50 56 82 95 100 100 100 100 100 100 100
PLEDVLLF	84	8	473.269	57 65 87 90 90 93 93 99
TAAELTVAGSP	84	11	508.762	86 82 90 94 98 59 50 72 98 100 99
VFHGLVSP	84	8	428.24	69 67 66 80 93 99 100 100
VLPVP	84	5	524.344	79 78 85 90 89
KWAAVVVPSGQEQ	84	13	699.873	70 70 83 82 93 99 100 100 93 51 61 97 95
YATFVTKTPPAAVLLK	84	16	860.506	61 63 82 80 95 96 98 100 97 84 62 56 74 98 99 98
TPLPGATTLLSHTVP	84	15	752.923	44 43 89 93 76 84 98 98 97 99 98 87 87 85 87
TGVLAESEGALERK	84	14	487.263	49 37 61 86 93 97 100 100 99 96 97 95 85 85
FVARPKPVAG	84	10	521.314	99 96 77 69 66 66 83 93 96 97
LVKWCCTLP	84	9	531.775	96 95 96 88 52 57 91 92 90
PPLAGP	84	6	551.319	100 99 99 93 50 63
KWAALVVEPPGEQEEMDQEKMC	84	22	849.727	82 90 99 100 100 100 100 100 100 97 95 90 92 99 89 51 86 88 92 34 19 52
DHLEDFDRW	84	9	411.516	85 51 69 72 97 97 98 94 94
EMATFKAHY	84	9	366.508	66 35 68 97 98 98 99 98 99
TVDQLHRW	84	8	352.186	70 68 86 81 99 90 89 92
LLPLEDVFSLDFVP	84	14	802.439	94 89 65 59 98 99 99 99 97 96 57 43 88 95
RAWPLEQEGPEYWDGETRKV	84	20	816.064	44 45 55 59 85 95 86 100 100 100 100 100 100 100 99 99 96 65 70 88
PFDLPLHTW	84	9	563.293	33 57 99 93 83 94 98 100 100
TDKLFTHHY	84	9	387.861	48 56 63 96 99 99 98 99 99
VLVEGLNLVKK	84	11	606.391	83 100 100 100 72 54 49 71 97 99 100
EARGFVWKDR	84	10	421.891	85 44 52 79 99 100 99 92 94 96
WSTAADMAKKKDTP	84	14	775.394	92 95 100 100 100 100 100 100 93 51 31 45 83 88
ESALKLLNN	84	9	501.285	57 52 95 97 82 91 99 95 89
PDFYARKPPVQ	84	11	659.352	48 68 84 95 99 98 77 67 90 100 99
SEALKLLNNLVGTL	84	14	495.632	79 93 100 100 100 100 100 97 95 96 45 26 68 77
LLYY	84	4	571.313	73 76 92 95
GPLGVP	84	6	539.319	88 59 76 95 94 94
KAAVPSFQR	84	9	335.194	59 74 88 99 99 98 94 71 73
TLRGYY	84	6	386.703	98 98 73 56 79 99
LTAEYYNQSNLTH	84	13	777.364	97 97 100 100 100 100 93 85 91 71 55 56 48
LFQLVAR	84	7	423.764	99 99 98 98 56 48 90
FSRDATFVTK	84	10	391.209	52 54 67 82 85 99 100 99 100 100
SHDALTEPW	84	9	528.244	65 48 86 83 88 91 96 99 99
RLDKLSHGF	84	9	358.201	49 52 74 85 99 100 99 99 99
ENPLLNSLAAVKSSAKA	84	17	571.657	77 59 81 96 99 100 100 100 100 100 100 100 92 38 38 65 83
KDVRYVLLSPHVNK	84	14	556.658	60 66 52 45 60 94 100 100 100 100 100 100 99 98
QDGRTAPWLQQEGQDYWDEETRKV	84	24	734.599	49 61 57 54 54 72 87 95 98 86 95 95 71 67 95 97 98 100 100 99 96 95 94 97
EGPVGLSSTAPAP	84	13	591.805	92 83 96 100 100 99 81 62 60 62 61 96 96
VDVDAEFEMPKDKK	84	14	825.911	92 95 100 94 89 99 97 67 23 30 90 98 100 100
SQLPKLVK	84	8	304.867	37 48 90 98 98 99 100 100
KTKTMEFVARPPKVQ	84	15	587.331	49 43 80 93 95 98 100 98 93 97 88 71 60 97 96
MKFVSF	84	6	379.698	73 59 80 92 99 99
TAEPYLLHF	83	9	545.783	90 90 96 77 51 61 97 94 97
AMDEQVAHAGP	83	11	563.253	73 79 100 100 99 98 70 39 69 97 98
SQDTQFVRDFNYAPNPR	83	17	685.665	52 54 98 99 99 100 98 95 69 62 97 98 99 95 89 46 72
STLLNKLLGQK	83	11	405.587	74 75 89 88 92 96 99 99 50 60 98
SVKFKYQGVP	83	10	384.889	65 70 88 99 99 98 90 49 87 92
VAKVGLLGFEVDHELPPF	83	18	492.523	60 60 70 69 77 95 99 98 99 100 100 100 98 98 52 43 91 96
EAGPWDTSHY	83	10	581.745	85 60 76 98 97 98 95 73 67 88
KNDAQTYGVGLRKEQ	83	15	853.944	99 71 94 100 100 100 100 100 99 85 76 45 40 54 91
TPKLQVYS	83	8	468.264	92 85 85 57 59 93 98 98
LLPPLSNN	83	8	867.493	99 99 100 88 78 77 56 72
ETDELKTSY	83	9	543.256	66 49 87 99 99 83 74 97 99
TEPLLQGHW	83	9	540.779	88 85 97 97 79 52 75 79 98
LVAL	83	4	415.292	72 63 99 99
KVLVEGLNLVKK	83	12	447.294	52 55 81 89 99 82 81 85 86 95 98 98
EAPVAVPTKR	83	10	356.545	85 63 57 66 94 94 92 94 94 97
HTDAYLAHF	83	9	537.754	56 71 61 73 92 100 100 100 99
TVDVHLFQF	83	9	553.287	84 81 91 81 73 95 84 63 98
SQDMELVETRSPDGTGFQ	83	18	998.95	66 78 100 100 100 100 100 100 99 98 79 55 69 59 56 52 97 95
MVDTLGFKF	83	9	529.274	97 98 98 59 50 54 97 99 99
KDENRHTPFF	83	10	645.816	97 96 90 48 48 63 99 97 98 100
MQVLLLDKVA	83	10	565.337	28 61 100 100 100 99 94 86 80 86
MRNFDLSPLMRQ	83	12	503.256	37 46 61 79 93 99 100 100 100 98 98 94
PGLPLKPTR	83	9	326.874	40 48 86 100 100 99 94 93 92
VDLGTLRG	83	8	415.74	100 100 100 99 94 88 34 54
KLLFENLTPLH	83	11	442.26	75 87 93 71 69 54 79 99 98 98 95
LGGL	83	4	359.228	88 73 90 82
KDWSF	83	5	341.662	75 78 69 97 99
LSRWDTAADMAAQLTKR	83	17	645.335	57 45 40 39 59 85 99 100 100 100 100 100 99 99 98 99 99
TVRPKLVKW	83	9	376.238	60 70 91 75 69 96 97 96 97
EPGAPFYTAVSRDP	83	14	753.87	86 62 56 54 60 99 99 92 89 92 88 93 97 99
AMELEEHYE	83	9	575.74	66 61 99 99 99 98 60 71 96
RNDLLLHDW	83	9	394.539	41 43 76 93 100 100 98 99 99
MEFDWHSLSYF	83	11	731.316	96 99 98 67 41 35 85 96 99 100 100
DHTKLTVTF	83	9	354.526	79 61 93 93 89 75 70 95 95
QEWFGKGAPYKQAQQMQEKMQ	83	21	847.742	34 50 59 65 67 79 74 80 86 95 100 99 99 98 99 99 99 100 100 78 89
WSLDQTHKF	83	9	387.861	61 46 59 95 93 97 98 100 100
LSGGLALVNMGSLFGAQVAKQ	83	21	687.711	57 45 48 54 72 86 93 93 89 97 99 100 100 100 79 60 96 100 99 93 91
ENPAGATQMQTNDMELVETRSGP	83	23	826.042	79 71 93 97 93 91 85 61 39 59 55 60 98 90 95 97 98 98 89 85 91 91 98
MEFVARKPP	83	9	537.795	98 100 100 99 91 87 50 38 88
TVKLKKCMHLGAP	83	13	357.209	79 55 60 57 67 96 91 94 95 97 96 97 97
TAAAVAVTAAVEELK	83	15	481.941	59 59 66 66 67 70 74 89 100 100 100 100 100 100 100
LVGVFNKE	83	8	453.263	98 99 100 97 86 44 46 95
EFMMELHTLR	83	10	436.214	61 46 57 97 99 99 97 94 90 92
FGGLVPAGGK	83	10	451.758	48 60 88 100 100 98 91 90 70 89
AGDELKSLY	83	9	498.257	97 81 96 97 98 61 44 75 100
ESADKGGDLLNTLNVK	83	16	837.444	69 39 41 65 96 76 70 98 99 100 95 92 97 97 99 99
YATFVTKTPAPAVLL	83	15	796.459	30 37 69 90 90 88 88 96 97 92 79 95 99 100 99
AVVESLQRVS	83	10	544.309	77 92 100 100 99 95 88 40 46 94
MLGLVKGK	83	8	423.268	93 96 79 80 92 62 65 98
ALDGGLEHTY	83	10	538.257	96 96 99 65 40 63 98 86 90 96
EVGDGLSYAKDGLAAP	83	16	781.894	67 55 84 100 100 100 86 48 44 61 98 96 97 98 98 98
TRPFGVELM	83	9	525.271	79 67 95 97 79 59 76 99 99
WSLLPPLSNN	83	10	570.807	52 55 88 99 100 79 73 93 93 99
TSVVSKGVMSEAR	83	13	450.907	72 67 82 86 96 96 97 97 92 52 61 89 92
KPLVGSVTLVKWDRDH	83	16	370.811	67 68 90 83 55 54 68 78 96 98 97 94 95 91 97 96
AAPPVEDHAAADMAAQLTKR	83	20	688.351	44 90 91 88 88 80 52 22 79 100 100 100 100 100 100 98 76 72 91 92
FAAFL	83	5	568.315	54 73 91 99 98
RPPKVQVSY	83	9	537.309	98 84 85 79 67 61 78 98 98
KAAEAFPSSLK	83	11	574.822	100 100 96 87 57 55 56 70 95 98 99
VVLDFFLKRS	83	10	408.575	86 95 98 100 99 97 94 85 26 51
LSGLGLEALSSVP	83	13	621.856	67 75 71 86 92 89 97 92 94 75 62 87 90
FGPGAEPHYLPQLR	83	14	396.208	62 54 67 68 79 93 79 74 97 98 98 96 99 99
ETAKKDYLGEPVTE	83	14	790.396	83 69 74 66 73 88 86 85 56 84 98 99 100 100
TAANSLSDPY	83	10	519.741	88 84 84 63 52 69 92 99 99 99
EQPLFLSHY	83	9	567.287	67 50 95 97 78 82 96 89 95
VGGGVLADAVKVTLGGPK	83	18	819.482	68 55 60 68 92 100 99 95 92 94 99 99 97 95 90 46 49 95
ASTVPGYPGAPGAGYGGAV	83	19	824.903	28 35 69 94 95 54 70 99 100 100 100 99 95 96 85 78 92 92 95
FELKGAAPTVGAGP	83	14	657.854	94 97 99 99 97 76 62 55 66 62 65 95 97 98
AVDKDAMRF	83	9	351.51	45 43 95 95 99 98 95 88 91
MRVATPM	83	7	403.206	48 60 81 93 100 100 100
FAFYMSVP	83	8	481.231	79 79 98 96 52 66 93 97
ERGHLVLHW	83	9	382.877	60 45 67 79 96 100 100 100 100
PDNYGPDSSLSYFYTAVSRPD	83	21	784.355	61 76 71 46 32 34 68 74 97 99 100 100 100 100 100 100 100 100 100 89 95
KAALALWYKKSEGVAK	83	16	441.51	85 90 95 97 98 98 98 98 99 98 82 40 21 35 97 99
SAPTKVTLGPK	83	11	366.888	49 50 60 76 98 98 94 95 97 98 98
TVAGTAKSPLWR	83	12	429.582	82 75 72 52 61 82 98 100 95 92 89 95
LDFVAR	83	6	360.706	99 99 97 89 49 65
KLQHLADFVR	83	10	409.572	86 69 80 99 99 93 91 83 52 74
ARQVELPKVTLTR	83	13	378.482	50 43 54 69 90 96 99 99 100 99 95 91 92
QGDYWDEFLKAGP	83	13	763.35	55 73 100 100 100 100 99 59 55 52 93 95 96
KPKLVKWHEQE	83	11	474.606	99 89 91 92 95 98 92 50 51 55 98
TDDHLEAKY	83	9	546.255	54 65 78 61 92 98 100 99 99
MDPLAGA	83	7	674.319	71 91 95 94 93 55 79
EGGRAYDQDY	83	10	587.243	82 67 81 79 76 77 79 87 100 100
ETFDTQFVFDNFP	83	13	803.855	91 71 77 94 89 91 88 91 56 67 68 96 97
QDWGHSPF	82	8	487.213	39 68 97 84 82 99 97 97
LGKLGVLGFEVDHEPPLF	82	18	656.362	54 57 92 99 85 86 99 97 97 98 98 98 91 96 55 39 54 94
VDDTQFVYSAP	82	11	621.293	96 98 98 96 92 91 90 44 37 77 90
YLAL	82	4	479.286	69 63 99 99
KSLVVALREFVK	82	12	347.971	77 79 95 99 100 100 99 92 49 37 65 99
KWEAANVAER	82	10	391.871	43 32 63 91 99 100 100 100 100 99
MLGLVSVYRVP	82	11	617.357	93 97 97 99 99 79 50 41 63 92 97
LSMQTPTAEGGLAADMAAQLTKR	82	23	591.056	65 51 38 48 46 44 63 79 94 93 91 95 99 99 99 99 100 100 99 100 99 99 99
EVRLDDKHY	82	9	392.199	60 45 65 93 99 94 94 93 98
DDVVDAEFGNWKDKK	82	15	589.288	71 68 82 99 99 98 100 99 50 40 43 93 97 98 100
NRVTKPEAGHFA	82	12	442.902	31 34 73 96 99 99 99 97 95 93 85 90
KQDVLFSHF	82	9	374.197	73 40 66 78 92 99 99 97 99
TVGLLMKEHF	82	10	392.214	59 49 48 76 99 98 99 99 99 99
ETDDDDEEKFFGY	82	13	403.162	88 72 94 93 74 71 74 94 96 97 65 59 96
RVPLEDFTF	82	9	562.294	48 54 72 86 92 94 97 100 100
YVDDHLANVP	82	10	571.778	99 100 100 99 61 62 54 59 94 97
ESALKLLFGPVP	82	12	635.878	90 89 100 100 100 100 99 48 28 40 97 99
LPMVTKPEAGHFA	82	13	466.581	32 24 35 88 97 99 100 100 99 99 100 99 99
EMFVARPKPVQ	82	11	434.573	90 77 99 99 98 95 73 61 52 70 92
SRFLAV	82	6	346.708	55 54 86 99 100 100
TAAPKLVKW	82	9	338.542	59 60 77 81 96 95 95 92 85
TVWLKLPP	82	8	477.295	69 66 74 72 81 98 100 100
KQPGRSAADTAAQLTKR	82	17	600.336	67 55 52 46 45 60 88 97 100 100 100 100 99 99 97 98 98
DGHVTVHDF	82	9	342.826	70 57 69 90 76 86 92 99 99
VTGTLELPEGVEMVMELEGVP	82	21	1115.06	95 91 95 98 100 100 100 100 99 96 95 97 50 72 97 90 62 76 56 21 37
MEFMGPVTDMYF	82	12	734.305	99 100 100 100 99 92 46 38 54 61 99 100
KDPGLRLYK	82	9	363.889	86 67 68 63 75 86 96 98 99
VHKVTEKPKLVKWDRDH	82	17	529.553	69 49 73 49 41 66 83 98 95 99 99 99 98 98 89 98 97
TVAKAMEFVARPP	82	13	472.927	61 48 54 55 70 86 100 100 100 98 99 100 100
HLPLLP	82	6	345.221	38 69 90 98 99 99
EAVKFFGGTVPR	82	12	436.575	89 78 87 90 99 99 90 39 43 90 93 94
RLYYNQSEAGSH	82	12	475.557	56 59 66 67 72 87 98 99 97 95 97 92
KGVVHDTWPQAL	82	12	675.863	79 51 74 83 67 82 82 97 97 77 96 100
VPGALE	82	6	585.326	95 69 65 73 92 98
FYWHECPTVP	82	10	639.783	55 57 95 94 82 63 88 92 96 98
FRGADEEVQRD	82	11	441.211	69 54 50 67 97 100 100 99 86 86 96
TADDLAEKF	82	9	505.246	93 82 95 50 41 91 95 96 97
FLKRLFGG	82	8	469.285	99 99 99 79 68 51 73 89
SEGTVVHHF	82	9	338.166	50 56 51 90 99 100 100 98 97
EQGASRPWLQQEGQDYWDEETRKV	82	24	734.599	66 45 44 45 51 62 83 95 99 99 96 96 43 62 99 100 100 100 100 100 98 97 95 98
HEGLQEPLSPPGHVP	82	15	797.405	100 100 100 100 99 100 96 91 79 62 49 41 27 93 96
FGGY	82	4	443.193	98 54 82 95
YVDDTQFVTTCLN	82	13	759.847	100 100 100 100 100 100 100 100 70 37 32 43 89
KPLVGSLVKWDDR	82	13	378.968	82 76 84 59 46 62 95 94 92 93 95 95 96
KGVVHDTWPQAL	82	12	450.911	84 46 66 74 61 86 92 98 99 82 99 99
PPFLQVVPEV	82	10	562.822	55 39 61 82 90 99 99 98 99 99
KNGSLLPPLSNN	82	12	627.349	44 35 52 91 99 100 100 91 80 95 97 99
KAVKDTVLLLPAEFFEAR	82	18	512.547	52 45 50 60 99 100 100 100 99 74 48 70 99 99 96 95 94 96
MMDTVLWSE	82	9	556.249	98 97 96 90 85 46 44 88 94
EYMDLTKP	82	8	498.74	70 46 54 99 99 98 95 95
EHATMQLGSMQ	82	11	616.774	79 35 59 77 97 93 92 93 95 90 93
HPLYGKFLK	82	9	368.218	29 52 81 98 87 91 100 100 100
PSQATRVPNSDGTYYTRW	82	18	700.338	34 44 62 65 56 65 88 85 86 99 100 99 99 100 99 99 99 98
TDKLRTLPFVVP	82	12	462.613	99 99 100 98 95 94 94 40 35 44 91 96
TEEKYCGYC	82	9	365.809	91 82 82 71 77 82 67 92 95
QFLVEVKHPLVKH	82	13	394.237	30 40 85 93 86 69 74 93 99 99 100 100 99
KATLLRLVQR	82	10	399.931	100 96 93 96 99 94 48 28 70 96
MLEHDNHNF	82	9	578.746	28 54 97 94 96 95 95 85 94
DDVVEEGFEEVKDKK	82	15	442.217	91 90 89 69 56 46 32 76 98 98 95 95 97 99 100
TLSMDGKKVRFF	82	12	476.93	63 52 56 50 93 97 98 100 96 90 93 96
TDDSSKA	82	7	723.321	46 70 99 99 99 79 81
FGATPL	82	6	605.33	68 71 88 78 92 94
TVTLEMPFKP	82	10	581.814	74 50 55 69 97 93 95 95 96 94
VTKTPPAAVLKKL	82	13	455.966	39 41 62 80 97 98 99 100 100 99 78 74 97
KPKLVKWD	82	8	338.543	93 70 89 57 65 92 92 97
MEYMGPHSLSYFSPPAVEPPDAAW	82	24	893.738	57 72 75 81 100 100 100 100 100 100 100 98 62 48 59 89 88 68 75 90 92 74 62 74
VLAAVPEGEPQSEYCCCAHVQHE	82	23	625.529	82 82 90 92 97 100 100 91 88 91 95 92 91 86 57 44 39 55 93 94 81 52 88
KDNQATYGVGLNT	82	13	690.841	68 67 37 38 73 96 99 98 99 98 97 97 97
EKTKYLTAALGAP	82	13	454.93	52 38 73 99 100 100 82 62 92 93 89 87 97
MYEMGPHSL	82	9	532.732	18 29 98 100 100 100 99 97 98
GYYNQSEASGLTH	82	13	713.814	81 83 97 92 89 91 94 85 41 37 90 94 90
MGNPMDLK	82	8	453.215	56 63 95 91 86 97 80 85
VALLYGH	82	7	386.721	52 72 99 97 88 81 83
WLLPPLSNN	82	9	527.29	55 63 86 85 80 81 93 94 98
MDAAAAVPGMAAQLTKR	82	17	426.228	28 51 70 97 96 75 55 51 75 99 100 100 99 100 99 97 99
ESDCCG	82	6	307.083	99 50 67 76 99 100
AKVNLGSLGDQVNVAKGAY	82	19	635.346	40 41 60 67 90 93 98 99 96 94 86 98 98 96 67 65 89 86 91
VVELLSATDFGP	81	12	624.332	93 91 100 100 99 94 89 44 49 44 86 93
RLEKDVHLY	81	9	391.552	45 49 74 82 92 95 99 100 100
LLME	81	4	505.27	86 56 93 91
KHVLPYGKF	81	9	363.546	73 61 84 69 57 97 98 98 97
WPLQHVDWYDQGEQQLQHV	81	19	802.718	79 50 74 75 70 84 91 95 100 100 90 100 100 99 98 100 88 14 46
KLLDERGEAG	81	10	544.291	100 100 100 98 89 39 35 66 95 97
DVMPVKLHW	81	9	375.536	52 40 46 99 99 100 100 99 100
KVGTVTPNVAEAVKNKA	81	17	432.252	90 52 54 70 95 100 95 92 98 100 100 100 100 99 49 37 60
ELDPDHAEY	81	9	544.73	86 83 99 72 72 46 79 97 99
PFGLVGKKVGM	81	11	378.224	30 44 72 91 99 99 99 98 86 83 96
HLLTVPLAMDDLGR	81	14	517.617	40 90 98 98 97 98 96 92 80 90 95 48 33 88
KALTEALTSANP	81	12	608.338	100 100 100 99 99 96 94 59 46 44 50 95
RPPKVQVY	81	8	329.531	66 77 90 87 74 63 96 100
TGANSGKMPNRL	81	12	415.88	70 54 51 57 97 99 100 99 95 84 80 94
KPKLVKWDDR	81	10	428.92	97 54 50 93 97 97 95 96 68 69
ECDSCG	81	6	307.084	95 67 72 62 96 96
FLVPQGK	81	7	394.737	88 93 99 93 78 46 74
YPVEPF	81	6	376.186	62 56 83 94 97 96
YLPKVPW	81	7	451.76	59 61 73 82 98 99 99
KTGEDLKKGGAP	81	12	600.833	97 87 45 61 97 98 87 79 67 83 85 92
LSENMKHSW	81	9	377.848	71 28 56 91 94 98 97 99 99
KNSGLKLPPLSDN	81	13	691.89	55 35 45 51 85 97 100 100 97 97 100 100 99
VDDTHKPAP	81	9	490.246	99 99 100 99 46 46 50 97 98
TAAVTLADVLKQVK	81	14	364.973	56 59 68 57 55 69 89 97 97 100 100 96 99 100
YLEDGKETLTSGAGP	81	15	769.38	75 81 99 99 80 86 98 94 87 43 40 52 95 96 97
TPYVTMPL	81	8	461.243	91 66 67 66 84 92 89 97
KWAALVVEPPGEQESCCPHCHVQEH	81	25	704.072	79 83 97 98 99 100 100 100 100 98 85 87 86 92 86 60 50 33 22 57 97 99 91 75 63
VTDDVKEML	81	9	525.267	92 95 99 99 91 48 63 49 97
MADGAAADHSW	81	11	566.232	90 95 99 79 60 49 85 91 72 80 95
DMVEPHTEAQSALPHKGSFVEAE	81	23	837.066	57 29 90 95 55 50 98 100 99 86 86 95 96 55 31 56 96 100 100 100 100 100 100
KDAEDQLGKTGP	81	12	629.823	99 98 82 86 96 89 91 61 37 45 94 98
TPRPSLEYP	81	9	530.276	95 86 69 41 57 86 97 99 99
NDGHVARPPKVQ	81	12	439.904	25 44 70 95 97 97 98 96 76 82 99 97
VPWLGAGAEGQDYWDEETR	81	19	726.998	88 75 79 75 62 60 50 63 85 68 62 98 98 99 100 100 98 94 93
AAGMLVTAADMAAQLTKR	81	18	606.993	59 51 39 25 51 66 85 97 97 100 100 100 100 99 100 99 98 99
LGLLHGYRGAD	81	11	391.213	50 59 99 100 100 99 98 79 80 48 82
HVVRLVKWDDR	81	11	474.939	37 56 59 50 98 100 100 99 98 99 99
SSDYLKYNW	81	9	588.274	98 94 94 85 76 51 46 89 97
ALMVFFLSRK	81	10	404.57	49 49 40 79 100 100 100 99 99 99
DYLKTESFEHD	81	11	692.309	54 52 97 99 89 76 80 75 98 79 95
ELDTDLMHF	81	9	560.753	80 68 95 92 93 90 66 57 89
EFDLLHDVP	81	9	542.77	73 65 93 99 98 54 73 86 90
NELLKTKMLEFPTPFTYK	81	18	734.063	32 51 81 93 74 60 59 68 100 100 100 100 100 98 96 96 73 82
MEFMGPHSLSYVMPTAVSFTASGCL	81	25	888.407	99 100 100 100 100 100 100 100 100 100 99 87 57 65 90 79 85 88 44 39 41 83 74 37 62
TAFVDD	81	6	667.294	56 61 75 98 99 99
TASMDAAQLTKR	81	12	431.559	94 78 57 28 66 96 98 94 95 90 86 92
DDDDEEETKFHD	81	12	747.779	25 38 90 99 100 100 99 95 97 98 52 83
ESAFAHRTW	81	9	368.845	65 54 76 98 97 86 84 82 90
LLVL	81	4	457.338	79 65 94 88
WSLLLPPLSNN	81	11	627.349	39 38 77 99 100 100 85 70 90 96 99
VPWLQQEGQDYWDEEKRT	81	18	769.696	92 83 90 85 60 55 81 67 72 99 91 95 98 97 94 85 48 71
MTDMVEEHY	81	9	577.733	61 84 90 40 59 97 99 99 99
ERFVKHLPLYGK	81	12	372.468	43 31 60 86 88 75 94 99 99 99 100 100
LDFLF	81	5	654.351	49 68 90 100 100
KHVVTEKPKLVKHTMDPGA	81	19	705.732	98 98 100 69 40 78 100 99 99 100 100 99 88 54 37 78 92 49 68
SLFAGADEVTVR	81	12	422.227	66 66 69 52 52 86 100 100 100 96 94 94
TGPLLKYQF	81	9	533.801	85 62 78 98 98 81 69 68 90
VMGSAQTDRVVQ	81	12	645.828	98 96 99 99 97 77 79 91 56 48 44 90
TVDEEHNY	81	8	503.708	88 94 100 99 96 38 43 91
FRLAE	81	5	318.179	66 54 86 100 99
KKLTVVPLL	81	9	505.852	88 75 65 44 60 99 99 100 100
LGAPVYMKPW	81	10	581.311	59 66 88 94 63 66 92 94 93 96
TVGHDLLPF	81	9	499.769	85 77 67 49 83 88 92 93 94
EVVL	81	4	459.281	82 54 96 92
ELEHLAKDF	81	9	551.283	81 41 84 76 99 85 70 96 96
RLDSFKEHF	81	9	393.536	34 44 78 92 94 98 99 95 97
DAAGQDQLYWDEETRKV	81	17	675.318	40 41 68 82 59 68 56 78 100 100 100 100 100 99 97 92 97
KPKLVKESYSAGP	81	13	468.601	100 96 97 98 99 98 56 30 34 55 95 97 98
TGKKKKLSLTSR	81	12	449.625	44 39 55 74 89 98 98 96 94 93 95 96
ENHMAMTHW	81	9	386.16	62 48 68 78 81 94 98 99 100
MMDVREGFP	81	9	541.245	99 99 99 86 70 54 46 85 90
ESALKLLFLPASVP	81	14	742.945	88 85 100 100 100 100 100 73 49 35 49 62 94 98
TVVYPFGPPLNP	81	12	650.852	59 70 94 96 99 99 84 74 69 62 80 85
KTPPAAVLLKKALQK	81	15	402.267	79 78 90 92 95 97 97 99 99 99 97 89 27 23 52
EGGMLQKHLW	81	10	400.206	62 37 54 68 94 96 99 99 100 100
KSSALYLLVGSAGP	81	14	681.891	100 98 94 94 99 100 98 82 32 30 85 66 61 95
KNAAHELEDR	81	10	394.867	61 37 45 73 94 100 100 100 100 100
EVRNYHADY	81	9	583.765	70 52 55 63 90 98 99 100 100
ETLHDDFPY	81	9	568.751	88 65 83 90 99 95 52 75 80
GPHVVAPKLKLS	81	12	312.197	40 46 55 82 82 83 91 99 98 98 98 99
TVDLKLVKY	81	9	539.829	55 52 78 79 76 89 99 99 99
NDLQKLPF	81	8	487.769	44 55 60 95 99 99 97 98
EMPRVPWLQQE	81	11	706.854	97 76 61 51 74 78 86 90 86 90 98
KHVFLPLPPGFP	81	12	450.264	88 69 91 93 99 98 74 49 55 85 82 86
SAGRLTLD	81	8	416.729	61 46 63 85 93 97 100 100
ALLDFFLSR	81	9	541.306	85 88 98 98 99 97 45 32 86
THDCALHRVP	81	10	383.525	79 31 67 62 93 95 90 95 98 98
EGAVKVTLGAKAAP	81	14	437.93	84 74 92 93 97 94 94 96 89 31 35 62 94 97
AAKDVKFGNDLRGK	81	14	380.464	52 60 51 70 90 98 100 99 95 94 70 67 84 99
QPLELVKVPN	81	10	568.838	34 31 67 94 95 96 99 100 97 95
EVPF	80	4	491.253	79 52 97 94
FVDRSEVL	80	8	482.759	99 98 95 41 38 77 99 100
MSCDGGYESMGPDGLLLRGY	80	20	707.642	37 59 75 80 59 52 60 71 57 73 100 100 100 100 100 100 100 99 98 96
NFLVPQG	80	7	387.711	45 50 85 98 98 93 97
FEVP	80	4	491.252	88 76 81 78
AANVPAFVSGKALKDAVK	80	18	447.262	61 56 72 92 99 100 100 100 99 62 57 78 80 90 73 59 78 96
GPFPHL	80	6	334.182	56 57 95 92 87 97
GPALELVKVGGP	80	12	568.838	26 32 68 84 90 89 89 95 100 99 98 98
RMGGFDLSPLMR	80	12	460.569	44 26 44 66 95 99 100 100 100 100 98 98
KVGPETQTGKLF	80	12	435.578	91 75 57 51 76 70 68 96 91 93 98 100
QPGKAVVGFAVPATKK	80	16	400.241	40 40 71 84 86 86 79 60 60 91 94 99 100 99 100 100
YTCGNGPHSLSYFYTAVSRDP	80	21	779.023	80 50 44 35 50 56 55 55 87 96 100 100 100 100 100 100 100 100 100 94 90
FDNYAPNPRMEP	80	12	725.826	70 76 89 100 100 99 95 90 52 35 68 93
RETKKELNGAGP	80	12	650.353	96 97 86 87 89 96 93 52 39 50 87 94
MYAVF	80	5	630.298	46 67 97 98 94
KAVAPSFARG	80	10	335.194	70 66 78 85 96 97 94 70 66 82
AMEDL	80	5	578.249	77 46 92 93 93
AGPGVHNFLVPQGK	80	14	474.261	98 92 76 52 40 24 60 95 100 100 99 95 98 98
TVRLYHPPCGPW	80	12	475.909	66 59 68 99 99 97 98 66 52 77 93 92
AGDLHLMHW	80	9	360.507	82 59 57 46 85 98 98 99 99
SLKTPAPAVLL	80	11	555.351	27 41 81 93 89 76 81 97 99 100 100
KAGDELKSLY	80	10	562.305	99 85 48 62 77 80 78 78 98 99
EHGLQEPL	80	8	461.736	91 66 74 71 70 89 89 92
HWVGQGATLSNKAQ	80	14	499.592	38 57 75 67 65 83 98 100 99 96 88 80 92 88
SLNTYHHSW	80	9	382.18	49 52 62 72 96 95 98 100 100
EDGALKSLAHVVP	80	13	668.368	97 85 71 89 100 100 99 98 54 18 44 95 97
VAGDHFVSTY	80	10	548.26	32 38 62 92 84 97 99 100 100 100
LLDFFKLSR	80	9	380.225	95 93 100 99 97 85 74 30 50
PNELLNLSAAVK	80	12	634.865	89 78 99 100 98 80 33 38 69 86 98 97
LAAWKVVPEPGE	80	12	648.355	85 78 76 70 85 95 100 100 83 57 39 95
KLQHLGVFRE	80	10	613.854	99 97 97 98 99 68 62 46 43 95
MVYVEMQPF	80	9	572.265	55 62 88 81 92 84 83 83 94
SLSDKDFRAF	80	10	395.866	51 52 65 85 82 97 92 86 94 98
SPDDMAAQLTKR	80	12	666.835	46 35 85 100 100 100 99 95 94 59 59 92
VEVTPVLLKSW	80	11	424.254	95 97 99 99 97 71 54 41 41 93 95
LWLPPLSNN	80	9	527.29	29 33 87 100 96 86 96 98 100
KADPAVEHF	80	9	338.506	43 40 69 82 93 99 100 97 98
APGGKAVVSTVLGW	80	14	671.381	45 49 73 67 72 86 95 85 74 96 99 99 92 91
TLSRWAADMAAQLTK	80	15	554.959	50 44 44 40 66 97 100 100 100 99 94 90 95 92 93
TPSLLHAAP	80	9	453.756	65 50 79 99 97 87 75 74 95
TVWLKLPPLSDN	80	12	691.89	34 33 48 76 90 99 100 93 93 100 99 97
LLLRGY	80	6	367.732	88 99 97 56 50 91
STAPTLKLHW	80	10	385.217	63 54 54 54 82 99 99 99 99 100
VKWDDRMLE	80	9	596.295	99 98 98 93 52 38 45 98 100
YADEVKLSVG	80	10	540.788	99 99 100 100 99 60 45 41 63 94
TVHKELVGVP	80	10	539.812	74 77 77 90 59 49 88 94 97 96
ARYLGPKL	80	8	306.523	38 38 72 98 100 99 98 98
TGADLLEKPF	80	10	545.793	79 55 82 98 98 97 86 63 65 78
ESVKFYNQSEAGSHT	80	15	561.929	75 59 60 55 68 83 63 63 99 100 100 99 98 85 93
DPDTFHEPDP	80	10	585.242	59 51 85 82 83 68 91 83 98 98
FPGGRCLEGAP	80	11	552.271	93 88 97 95 62 50 49 62 89 96 98
KLDSFEKFY	80	9	392.869	90 81 91 88 82 81 37 73 97
KAKLYYLRE	80	9	395.235	75 74 80 98 99 98 78 29 89
FADGALDNAPEEKA	80	14	724.343	78 76 91 70 66 90 87 75 94 99 99 92 40 63
ENPLLNSLAAVKKSTQ	80	16	856.979	69 51 67 100 100 100 99 100 100 99 99 98 57 31 27 84
DDDDEEETKFDH	80	12	747.779	23 31 79 98 98 99 97 65 75 99 100 97
YLALENDLAQVCLP	80	14	781.405	72 84 100 100 99 96 98 94 54 40 48 54 89 92
SHDHALMNF	80	9	357.827	51 51 93 91 93 85 62 95 97
NDGHVARPPKVQ	80	12	439.904	25 44 71 95 99 94 96 98 73 73 97 94
AHGLLDFVAR	80	10	366.873	48 31 66 89 99 98 98 93 88 91
SLEEQWHRW	80	9	424.204	43 48 78 80 90 96 94 94 97
KPLKVLGWDRDH	80	12	366.708	70 48 69 80 98 71 59 96 95 89 95 89
KNLLTLLQG	80	9	500.314	50 44 71 92 97 99 99 77 90
QARLQELAQTK	80	11	429.245	38 38 56 88 92 100 99 97 88 90 92
EMFVRAKPPVQVYSR	80	15	452.497	75 41 77 96 59 56 62 65 88 99 96 98 94 94 98
PFPLQVVPEV	80	10	562.822	51 54 59 67 74 98 99 99 99 99
TPGSLDAHW	80	9	492.233	72 35 48 73 98 98 97 98 100
TGAGPEKRLLR	80	11	399.91	43 29 52 85 100 100 87 86 99 100 100
ECDSCG	80	6	307.084	99 60 68 60 96 97
QREGQDQSQDMELVETRSPDGGTFQ	80	25	946.758	44 46 79 50 37 50 67 89 83 99 100 100 100 100 100 100 100 83 65 85 70 83 89 91 85
KVLDLKMHPLVKH	80	13	390.238	62 56 63 66 62 66 67 97 99 99 100 100 100
TVHACTHLW	80	9	534.257	75 63 56 67 73 97 93 96 97
TFFYSMVP	80	8	496.236	98 98 100 100 61 25 68 89
EPGAPLGFVY	80	10	525.273	82 49 51 59 86 91 82 97 100 100
TWAADTAAKTKTAP	80	14	716.88	74 87 100 100 100 99 99 97 57 40 41 44 88 92
KTLFEPGEMVRAAAD	80	15	545.613	59 61 86 96 99 100 100 100 100 99 60 49 50 49 90
EMFV	80	4	525.238	86 40 97 95
TAAHELFDY	80	9	533.747	67 60 63 48 88 95 97 100 100
TLLHPLAMDDKTP	80	13	726.388	97 98 100 100 99 97 88 32 61 91 43 41 89
YVPFGPPLPN	80	10	550.793	55 63 88 92 79 76 85 82 88 89
AVDTLENRY	80	9	540.77	69 79 100 100 97 57 43 81 92
KLRLAF	80	6	374.247	70 61 61 86 99 100
ENSQDMELVTTRDP	80	14	817.869	51 49 80 66 97 85 95 93 98 69 54 82 97 98
TLSLLGALNEDRL	79	13	472.265	82 68 52 48 54 74 99 99 91 90 91 92 95
TPRSLAFDW	79	9	546.779	80 50 56 61 78 92 99 100 100
EAGPSDMAAQLTKR	79	14	492.253	68 44 51 61 63 92 69 99 99 92 95 92 95 97
VLLPEGDETRVP	79	12	662.861	68 91 100 97 97 59 74 94 43 44 92 97
TPAGAALVAQKPL	79	13	618.87	88 79 96 90 95 93 88 83 86 38 35 73 91
DRQNAPMAYLFAAELVESNVPAAAE	79	25	670.079	46 31 43 73 88 76 95 98 100 100 100 99 97 97 95 96 97 71 56 48 79 93 90 48 75
KPGLPLTLREW	79	11	437.259	77 55 57 73 97 98 98 94 62 73 90
ALRGLP	79	6	313.702	100 98 69 41 82 88
SLMVAFEHF	79	9	540.764	49 54 51 74 96 97 98 99 100
MQVLLLDKVA	79	10	565.337	13 33 97 99 100 97 88 77 96 98
LGAPPGFKMPF	79	11	581.311	40 52 93 100 76 51 72 99 99 98 98
KPLVKKWDHSSP	79	12	356.205	88 77 86 73 72 85 95 95 39 56 94 94
TMDSMLHTF	79	9	541.737	89 78 97 94 31 57 83 95 95
MLGLVGKKVMGTR	79	13	463.941	96 98 90 93 99 97 94 99 95 20 18 57 79
ENEHVRGLLAPQ	79	12	681.866	82 60 86 59 69 62 71 98 95 92 93 87
LALNEDLRMQVP	79	12	699.875	75 75 96 95 98 97 88 84 28 41 86 92
ELPAFPTPFELLENLKTAW	79	19	739.396	83 59 57 79 74 71 89 91 96 100 100 97 89 34 39 71 87 96 98
HDNGMGPH	79	8	432.673	91 46 40 65 99 100 99 97
ANLPVLVVR	79	9	490.817	37 39 69 97 96 93 94 95 97
TDRPYEGQM	79	9	548.739	56 65 70 72 89 98 92 79 95
TFFYGSRG	79	8	467.725	100 100 100 100 95 45 28 70
QADLEREPY	79	9	560.768	56 73 99 96 93 40 65 95 98
LLPLEDVFSGTLAAGLSVTGR	79	21	706.065	99 99 100 100 100 100 100 100 80 31 37 60 79 76 41 41 48 92 94 96 99
KELSLTWQRE	79	10	430.566	19 34 63 91 99 100 100 97 95 98
FNDAVRVT	79	8	461.243	98 97 100 96 93 52 48 51
PVVYLVMGLVGPMGAGKSTLPPF	79	23	583.325	38 38 45 56 79 76 55 69 82 98 88 91 93 96 92 93 95 99 99 98 75 76 97
EMYMGHPSLSCTQ	79	13	742.302	93 85 99 99 98 66 71 92 92 79 34 34 90
KSGGGLKLPPLSDN	79	14	691.89	61 30 32 50 77 94 98 100 100 93 86 98 100 98
ESALKLVPGFLP	79	12	635.878	88 88 100 100 100 100 80 46 38 41 85 88
DVVAVYHWH	79	9	375.854	52 41 59 71 97 98 97 99 99
EGPPDTYSQPCHGP	79	14	742.805	74 56 82 96 98 99 96 90 86 74 45 30 89 95
TVDSLKHGF	79	9	335.178	45 48 79 67 86 98 97 98 98
EDVLVLKMMVP	79	11	637.353	91 90 97 100 99 95 39 23 45 98 98
PLEDVLLF	79	8	473.268	51 62 88 89 81 82 84 98
FGLVLNALSP	79	10	515.801	94 88 99 97 92 43 38 51 95 97
DLGPW	79	5	587.288	60 59 91 94 93
LVVP	79	4	427.292	75 51 97 94
EVRGSDAF	79	8	440.712	72 51 61 68 86 97 100 100
DNGHMGPH	79	8	432.673	39 37 68 95 100 100 99 98
VFSGKALKDAVK	79	12	421.587	85 75 65 46 68 98 99 97 73 59 94 93
AAPKSFFHPF	79	10	383.534	40 63 60 60 78 100 99 98 97 98
KLDEFENHY	79	9	597.776	99 99 99 92 54 50 48 79 95
YWDEGTR	79	7	463.704	88 94 98 62 37 86 90
TVFRAVGYVDDTQ	79	13	735.866	43 38 41 52 85 92 90 95 99 100 100 100 97
RFEDKGKVFR	79	10	321.182	57 63 89 90 66 63 97 90 86 90
EARVTGFPLTAGP	79	13	439.242	55 34 50 85 92 95 91 86 87 73 91 94 97
PHETLVVK	79	8	308.185	33 28 82 93 99 100 100 100
KLLDEGRWFHGVL	79	13	785.434	100 100 100 100 99 75 57 39 32 33 96 100 100
SRFLAVGY	79	8	456.75	51 44 63 82 95 99 100 100
KLDNYNHSY	79	9	385.18	77 66 82 77 86 78 54 94 99
LSVKVALERVFK	79	12	463.626	43 44 68 96 100 100 100 95 65 49 94 99
TADLQSGHVP	79	10	512.757	98 96 100 99 94 83 41 21 73 88
FLVP	79	4	475.292	67 56 98 96
TPAP	79	4	385.206	74 52 97 94
RVWPLQ	79	6	399.735	68 62 69 78 99 98
TEHVFTEGPGAVNEEESFGVTY	79	22	600.525	66 69 63 88 96 100 100 96 60 72 99 97 66 85 51 49 39 90 89 92 79 97
TVFGLSW	79	7	405.214	86 70 60 48 93 99 99
KADAFGLLVK	79	10	531.322	97 94 68 48 68 41 77 100 100 100
YTAVRSPDRGD	79	11	412.871	100 100 83 59 51 56 59 81 93 92 98
DHPD	79	4	483.188	76 43 98 99
PNPVDVAVAW	79	10	534.28	55 48 63 82 96 90 82 78 98 99
VYGVDDTEHKPFGP	79	14	780.871	97 70 70 97 99 99 95 55 18 37 79 95 97 98
MENDVDWRSYFYTAVSRPD	79	19	784.355	79 85 61 59 39 38 25 57 99 100 100 100 100 100 100 100 99 74 91
LVAVEVEQLGEHECWHFNGYSQDFTQ	79	26	1022.47	63 65 85 95 99 98 99 99 99 99 99 98 96 61 65 77 71 34 43 94 96 92 67 51 45 67
LAELSGHTY	79	9	495.748	67 70 99 98 73 63 59 85 99
EVAHLTLGPAGPLGVP	79	16	764.43	75 62 81 80 92 88 86 83 74 81 87 38 57 91 95 96
TFFYVSMP	79	8	496.236	97 94 99 97 60 51 40 93
AVVGSPDRGDVTRFAV	79	16	412.225	99 99 97 62 69 77 90 95 93 95 84 39 34 45 92 95
VGRYADEVVRTKEAK	79	15	430.989	38 32 56 87 96 100 100 100 95 85 56 63 85 94 100
SLTRGTPVTVYPAKTQ	79	16	573.652	55 54 50 41 45 70 67 86 100 100 100 100 100 100 100 98
TPLVSRGAL	79	9	457.277	100 100 100 99 60 38 44 74 99
KETVKGGPVAEAVKQGK	79	17	576	43 57 65 75 86 82 74 91 100 100 100 99 99 99 55 43 79
EGPVGLSNQKGP	79	12	591.809	93 84 93 100 100 100 71 39 33 45 94 97
WQVADGGADQSQDMELVETRSP	79	22	807.037	52 41 40 35 48 43 59 72 82 89 100 100 100 100 100 100 100 100 100 100 90 89
TFFYGNSR	79	8	496.236	95 96 100 100 99 52 32 59
TLLLLQG	79	7	379.245	40 46 82 99 99 93 93
MEFVARPKPVHRGPW	79	15	602.991	99 100 100 97 48 56 82 77 84 98 41 44 61 97 99
VTMSSMEHHF	79	10	402.506	44 45 48 71 85 99 100 99 100 100
FSVKLQ	79	6	721.426	67 75 98 76 68 90
SVSKGLGADEAQP	79	13	420.217	68 52 51 52 70 92 83 83 99 98 94 90 94
HVQHEGLQEPLTLELSQ	79	17	979.498	62 71 96 99 100 55 40 87 99 80 78 94 95 96 56 45 89
TPCCSSVE	79	8	413.159	86 54 67 59 78 91 99 99
GVPEELAERAF	79	11	609.313	65 85 100 100 100 100 98 46 18 67 92
DPGGAPPE	79	8	739.327	66 54 79 86 91 84 74 97
MFTLNAEVRKEQKPVTM	79	17	674.689	100 100 100 100 99 98 98 89 85 84 89 46 44 67 44 45 54
TVSKP	79	5	531.314	74 69 76 80 95
KWAALVVPEPGE	79	12	648.355	50 54 76 77 90 99 100 100 82 74 50 95
LALNEGFAVP	79	10	515.78	99 91 98 95 96 49 46 41 83 91
EGTTDVVLNWLKEAH	79	15	428.721	46 24 33 49 85 90 94 89 97 98 98 95 97 98 91
TADHALMPF	79	9	501.74	57 43 63 56 96 99 100 98 97
LSSYF	79	5	616.298	40 61 95 100 99
EVGAAGPLW	79	9	899.462	63 43 44 67 98 98 98 99 100
FMVSPAGP	79	8	805.388	66 56 97 73 65 94 90 90
FDSDVGEGRLY	79	11	629.293	98 99 98 99 99 92 90 50 31 34 79
LHPLP	79	5	576.351	72 50 79 94 99
TDKFVRF	79	7	456.75	46 54 63 96 98 97 98
MFPW	79	4	580.26	79 61 85 90
FETHTPNAVDQYESGSRMC	79	19	724.642	54 67 73 85 99 82 88 100 100 100 99 98 97 93 94 79 27 14 49
THLGNEMLA	79	9	493.242	85 55 81 62 52 81 92 100 100
TGPLVDGSKKSPE	79	13	657.848	92 95 100 100 100 99 50 35 43 60 84 75 91
KPLGLVKWDHRD	79	12	366.708	75 61 70 60 76 82 96 91 86 65 88 96
FGPGRAAQQVVAAVEGK	79	17	562.305	46 40 51 56 60 76 88 60 68 100 100 100 99 99 100 99 99
EVHLLPPLHLLK	79	12	352.972	49 34 44 95 93 76 67 94 93 100 100 100
GPHSLKKKSY	79	10	382.22	51 60 79 92 79 66 73 90 98 99
FGGLDALLKE	79	10	531.796	68 79 92 96 90 43 51 90 86 91
LTAKHKPLL	79	9	340.89	54 49 63 69 77 98 99 100 100
KTLFEPDAENRFAP	79	14	817.914	100 100 100 100 100 99 87 69 50 27 34 49 93 96
KLSAAMEKRLS	79	11	411.904	89 81 94 97 100 97 98 89 28 27 67
TFFYMSVP	79	8	496.236	98 97 100 99 41 37 68 91
GLAYVPMKPW	79	10	581.311	39 62 77 75 70 92 90 93 91 96
EHAMEWHYR	79	9	315.391	90 50 54 37 98 98 93 95 94
LAVGVLCEPLLW	79	12	656.873	99 99 100 95 87 95 48 51 31 51 93 96
KFAPLLY	79	7	426.255	77 60 61 62 94 98 99
KEGLLVVYVVNK	79	12	454.278	48 62 69 84 78 63 68 94 98 98 93 88
FVRF	78	4	568.324	98 48 74 95
FPPVTKPEAGHFA	78	13	466.581	23 19 37 77 92 98 99 98 97 96 97 96 97
FGAVFKLRS	78	9	342.202	71 45 44 83 95 94 85 92 100
WATVGQYGGLMKQAQQMQEK	78	20	761.375	48 45 54 57 54 56 62 65 86 100 100 100 99 99 97 97 99 97 76 84
EAALKKALECAADPVEVK	78	18	943.017	80 73 90 94 96 100 100 100 99 50 30 22 39 51 98 99 98 98
LSLCQVPSWTAADMAAQLTK	78	20	712.027	97 39 35 29 34 51 65 74 83 100 100 100 100 99 100 100 99 100 84 85
FGPLAFLKLSPHVNK	78	15	417.745	56 48 57 63 51 50 72 88 99 100 100 99 99 99 100
VETRSGPDGTFQ	78	12	647.307	90 93 91 91 59 39 41 78 73 90 100 99
AAAKLAAELHGVK	78	13	426.923	68 61 61 60 82 99 99 98 96 88 52 60 96
EAGHVHGLQEPL	78	12	643.828	91 54 57 52 86 79 79 79 76 99 96 97
EMYMGPSHLSY	78	11	657.779	91 66 89 81 95 85 52 34 74 98 100
HDQLEFHHW	78	9	416.856	32 60 59 76 86 97 98 100 100
TVDVLEHKP	78	9	519.285	92 94 100 100 98 63 18 60 81
FVDRESVL	78	8	482.759	97 94 95 40 45 60 98 100
YGAVLGPKLKLSR	78	13	351.223	46 38 50 57 75 76 88 99 99 99 99 99 98
EMYMGFDPEVP	78	11	657.776	91 71 97 95 92 63 63 40 61 93 96
TGDLQLLSF	78	9	497.267	51 48 85 79 62 86 96 99 99
TAAGFHPELF	78	10	545.273	90 84 72 45 55 57 85 96 100 100
KWAALVVPPGE	78	11	583.833	39 41 65 73 91 99 100 100 86 73 96
DDDDEETKFDH	78	11	683.256	22 48 98 99 99 91 45 69 99 99 95
TPNKLSYTPW	78	10	402.877	82 65 67 70 88 63 65 95 94 97
TVATDLAHF	78	9	487.751	89 79 88 70 40 49 96 97 99
GDRSFLA	78	7	383.198	77 74 59 60 84 96 99
TVVWPPQE	78	8	478.248	79 44 40 68 100 99 98 100
TVLLWSALDRP	78	11	635.862	66 65 81 79 72 61 66 97 96 85 95
ELAKLAGDEAWEAKELLLA	78	19	690.71	92 82 90 88 95 96 79 72 65 70 98 100 99 37 22 31 88 94 93
LGYLRL	78	6	367.731	92 88 89 76 52 72
VVAGAF	78	6	563.319	89 77 68 59 80 97
TAELHDRYP	78	9	551.269	63 62 88 99 96 89 49 72 86
KPLVQQQPKLVKW	78	13	319.199	81 71 85 70 46 40 48 90 96 97 98 98 98
KHVLPYGKFL	78	10	401.241	68 44 78 88 75 95 85 62 91 96
KHFVPLYKGFLK	78	12	492.962	63 35 61 82 97 99 98 63 50 92 99 98
TFNFARPPK	78	9	359.865	55 46 55 65 97 98 97 96 96
KMGPW	78	5	618.312	70 50 92 88 91
WGGLWFGPDQDTAAQLTKR	78	19	537.527	55 44 48 51 51 65 69 74 88 70 96 98 99 99 98 98 96 94 95
TTGGLPEW	78	8	430.711	96 86 85 76 74 45 68 96
FGPGCGELAQTK	78	12	403.197	79 61 46 37 49 86 92 98 99 96 99 98
PQNLSLLTTQPPVP	78	14	752.923	21 25 37 66 89 97 96 87 97 95 95 98 98 98
ECDSCG	78	6	307.084	93 59 67 59 96 97
VPHEVQGHTLPLSPSW	78	16	595.306	57 54 62 94 46 54 85 100 100 99 84 96 90 46 90 95
TPAWLRWE	78	8	353.517	54 35 54 92 97 98 97 99
KAADVKFCAELVP	78	13	695.877	54 75 93 100 100 98 97 57 44 51 55 95 97
ATVPVPAPKVFR	78	12	427.93	99 100 100 98 46 15 31 67 97 94 94 98
TPKPAAVLLK	78	10	346.561	37 29 50 74 96 98 99 99 100 100
ESLSVDGLQEPLTLYYF	78	17	658.666	61 44 57 54 46 63 69 80 82 100 100 99 98 95 89 95 96
ESRAYVLNF	78	9	549.783	59 46 65 70 78 94 96 96 99
VRLDGFRK	78	8	330.866	48 46 73 98 95 95 79 90
LGAVYMPKPW	78	10	581.311	56 52 72 71 68 87 91 94 93 96
TLCYETVQW	78	9	571.76	83 72 56 45 68 82 99 98 100
KQALSFDEVVR	78	11	431.242	98 48 54 55 50 61 99 100 99 99 99
EVVPHDVLF	78	9	527.783	79 71 89 96 69 86 63 59 93
YSAGAPESFY	78	10	546.242	94 92 95 97 97 78 81 38 30 79
TFFYMSVP	78	8	496.236	95 83 98 93 31 45 84 95
TLLTTKMLGAP	78	11	573.334	83 73 70 57 61 83 70 78 90 95 97
LVVEGLNLVK	78	10	542.343	91 95 100 99 50 44 83 91 56 70
SHDLEEAKY	78	9	364.504	50 33 77 87 94 95 86 90 92
FFYGLFAGP	78	9	509.759	96 96 97 89 54 48 49 84 91
EAALVRRASEAGAEVEVK	78	18	629.014	93 82 83 65 46 38 28 33 68 100 100 98 95 93 89 98 98 99
SSTTLVR	78	7	382.221	38 49 71 96 97 97 98
KLLFENLTPLHANSR	78	15	439	79 88 95 88 83 50 61 77 99 100 99 97 37 31 86
KVLWDDR	78	7	311.171	51 54 68 91 94 95 93
LAVGYVDDPVLNAH	78	14	741.883	79 86 100 100 100 100 100 100 73 37 27 65 41 86
RVDTYKHPW	78	9	401.209	40 43 71 76 92 95 89 98 98
LGVFLPSGHP	78	10	512.284	56 56 87 98 95 82 80 75 55 94
VPGAVKKGDP	78	10	484.282	97 96 79 74 68 72 81 91 61 61
LVKWDDRML	78	9	392.546	79 84 98 98 94 56 48 49 96
KWAALVVEPPGEQSYTEDCCPPQHE	78	25	938.426	90 93 99 100 100 100 99 100 99 61 50 95 94 96 84 59 84 46 29 34 65 84 90 28 71
KDYVGVTSSV	78	10	527.774	98 96 85 67 38 38 63 97 100 100
EVRWFAY	78	7	485.747	73 57 60 66 90 100 100
KWEAANTSLGP	78	11	587.304	99 97 99 97 91 52 38 37 52 97 98
APAEHGGLGDLCQKLEQMQEKMQ	78	23	847.742	16 35 85 96 83 74 59 74 86 88 80 73 65 97 91 62 84 94 98 100 100 69 82
TVGLAEKMVMRGE	78	13	474.249	54 49 67 92 98 99 98 99 98 81 45 40 95
PAAQPALTTSAGP	78	13	591.316	93 89 95 97 95 95 92 51 44 46 57 65 94
HVTLDKPKLVKWHEAW	78	16	398.223	41 67 90 95 79 52 49 61 86 100 99 95 82 79 75 95
AATGKSSFRAP	78	11	546.793	70 67 95 78 77 67 60 85 79 88 91
VAVLLTEPER	78	10	376.224	88 49 60 71 78 79 89 84 88 92
PVVDKLYPF	78	9	539.303	38 61 71 79 73 85 98 98 98
LGGERQYDVP	78	10	567.283	93 67 82 97 78 33 49 85 97 98
EFLFN	78	5	669.327	77 66 79 82 85
KPPRAVFVQ	78	9	347.878	59 69 85 76 72 78 79 94 90
EHMATLWRF	78	9	397.531	88 54 49 63 95 96 86 78 90
LSQPKLV	78	7	392.749	76 35 56 94 89 96 99
LLDANRDEY	78	9	554.767	100 100 100 90 34 30 55 95 97
HLVSNERTF	78	9	368.193	57 79 85 76 52 92 86 85 88
FYTAV	78	5	600.304	73 82 99 76 57
KWAALVVPDDNSVP	78	14	755.9	66 46 50 52 81 98 99 99 86 66 56 96 96 96
TLAAVLYEEY	78	10	586.298	59 50 62 73 73 80 85 96 99 100
RLDEQADHY	78	9	382.844	38 44 69 83 78 95 99 97 97
HDNGMGPHS	78	9	476.189	88 52 44 70 100 100 98 63 85
KVVANQLLHMLESN	78	14	532.625	89 97 99 81 43 55 97 99 86 29 37 79 100 100
TNSEYVKLQ	78	9	361.189	45 32 43 87 99 100 100 99 96
FLVGAP	78	6	603.35	61 61 85 82 83 93
TPCPPDAAPY	78	10	516.233	70 35 55 78 88 88 79 87 98 99
KDMQVFHLY	78	9	394.198	66 65 28 51 97 99 98 99 99
EVDLLLKDSSVDVP	78	14	510.28	86 63 77 75 90 98 98 96 57 48 44 67 95 96
FYGFTPNAVENYESGQEGY	78	19	543.734	45 40 54 86 90 49 44 72 88 99 97 99 99 97 91 57 94 81 96
LVVESGPECMGTYSQPPCGH	78	20	697.644	98 98 99 100 88 72 90 70 41 25 54 96 92 93 84 83 84 49 56 81
KDNAGATYGVGLN	78	13	640.318	57 62 48 39 41 77 93 97 100 100 100 99 98
YFQGKAVVESLQ	78	12	684.861	45 43 57 69 73 69 85 99 98 96 100 98
KVLKWDDRPF	78	10	435.244	54 45 74 98 99 98 91 61 71 86
ESALKLLFGPTVP	78	13	686.402	87 85 99 100 100 100 99 44 22 24 59 96 98
EPAVAAVTKPR	78	11	380.224	80 54 68 77 90 97 96 63 51 85 92
LGVTVSDEQEPLTLRDW	78	17	490.253	67 46 55 48 40 40 63 79 85 99 100 100 100 100 99 99 99
TVWLKLPPLSNN	78	12	691.396	57 55 68 75 89 99 99 69 50 86 89 96
PKLVGVSKHTLVKWDRDH	77	18	353.37	60 82 96 95 59 39 40 45 29 62 97 99 100 100 100 98 99 100
SLRWTAADMSAQLTKR	77	16	459.496	31 35 51 83 94 99 97 97 41 56 93 86 96 92 93 97
EMLVETGVTTMYFQ	77	14	824.884	83 60 99 100 100 96 41 49 62 55 48 97 100 99
ESLATEGLQEPLTLR	77	15	552.965	74 44 46 41 50 79 77 80 94 99 98 99 93 95 96
LSQDLTHRF	77	9	372.864	49 41 50 77 99 99 94 95 96
DHYDHLSVW	77	9	391.177	66 41 90 95 67 75 73 95 97
TVDLMHDEF	77	9	553.745	57 63 98 97 70 51 76 86 98
GVGGVLADAVKVTLKGP	77	17	527.651	40 54 66 66 75 84 94 55 45 96 97 97 91 93 86 87 93
QGDQSQDMELVETRHGVTHEE	77	21	809.025	26 21 48 54 82 86 99 99 100 100 100 100 99 97 81 95 78 90 34 65 78
ETLVETRGGEPSAFQ	77	15	810.898	96 91 98 100 100 98 96 46 30 57 52 51 57 97 95
KRDNFKTEEYSCCD	77	14	869.363	57 57 88 79 88 92 99 100 100 100 97 55 23 51
KLFNGGKERF	77	10	399.225	86 88 99 96 88 38 40 82 71 87
TVHEFTPGG	77	9	472.727	62 56 54 84 77 82 96 92 96
KAGDELKKPQVPSGP	77	15	775.931	97 85 63 84 94 95 99 67 18 29 43 95 99 99 99
RMNLTLSPAEGSKKAGK	77	17	447.75	57 26 41 62 96 100 100 100 100 100 66 45 50 94 93 93 98
EANKNLDFVGGAE	77	13	682.329	70 43 41 44 57 76 89 96 100 98 96 99 100
VPNMGGLVSPDSDGTYYTWR	77	20	739.016	61 40 41 21 35 60 88 95 95 75 82 99 98 93 92 95 95 96 95 95
RAPASLEALKLVQ	77	13	465.95	31 30 33 68 91 99 100 100 100 91 76 95 95
EVLDFRTQ	77	8	336.51	77 39 46 78 100 98 93 90
EGAVKVTLGKP	77	11	549.829	82 70 97 98 96 85 35 38 72 83 95
LSEMLSLMPTVVED	77	14	782.389	77 76 99 65 73 71 31 68 48 79 99 100 100 100
KQNHLGTLGR	77	10	375.216	48 39 52 67 99 98 97 92 90 95
TPVTETVYPAKTQ	77	13	717.877	82 66 77 67 67 81 85 95 55 54 92 96 93
EQEALWGHVP	77	10	583.287	73 65 100 99 98 81 48 28 90 93
APPKRVFEMVQVYSGVHPAED	77	21	589.802	88 65 38 27 33 81 90 93 79 95 95 98 99 87 27 48 96 99 99 97 97
VAMARL	77	6	330.697	98 97 86 52 41 90
ETDSARDADGP	77	11	567.24	91 80 97 92 89 41 45 35 89 96 98
TADTFLTPF	77	9	506.754	72 55 66 60 73 83 98 95 95
LAGPPGFKMFP	77	11	581.311	41 55 88 100 98 59 56 75 95 95 92
FDSDAASLEACAGP	77	14	677.291	71 77 96 97 93 98 86 34 37 27 76 95 97 99
TDTDNKNLEMCSCDLLTDYSPEKL	77	24	687.808	43 56 68 85 71 69 66 73 86 66 56 33 37 59 98 100 100 100 100 100 100 100 97 98
EAPAGFSAKLTVATSK	77	16	526.624	76 55 60 62 41 44 60 97 98 99 95 84 79 94 99 99
MVTLHECTHRVDLLGASR	77	18	408.415	45 65 89 92 52 70 70 85 68 49 56 97 100 99 85 87 93 96
ECDSCG	77	6	307.084	99 55 63 56 95 96
TLKNGGKKVGMTR	77	13	348.207	79 66 25 15 35 98 100 100 100 99 97 98 96
TVVYPFPGLP	77	10	545.304	79 75 79 63 39 54 96 96 97 96
MYEVLHGF	77	8	498.238	19 33 79 94 97 99 100 100
LTVHPSDFALKQATAELVETAKR	77	23	505.884	59 52 62 35 41 54 77 72 70 65 60 63 72 98 100 100 100 100 100 100 100 100 99
TNDLQWHYP	77	9	587.27	56 50 85 69 59 96 94 94 94
TVRSFVDFAGP	77	11	399.207	71 68 82 94 100 99 98 60 32 67 79
WAALVKVPEDDCMSPQPCGH	77	20	728.333	79 76 86 90 88 96 99 99 99 80 48 31 31 95 90 90 88 55 45 84
EAETLFSK	77	8	462.737	89 72 94 70 82 88 56 67
MEPVRPW	77	7	457.731	95 96 62 50 49 91 97
SNGTYARPPK	77	10	364.195	41 35 46 74 86 96 96 98 99 99
TLFHPTEPF	77	9	544.776	97 93 74 32 49 79 95 85 91
KAGGEVLHDF	77	10	536.775	99 70 54 34 49 68 100 100 100 99
EPGYWDGEVTRK	77	12	479.565	86 67 80 96 98 99 92 93 41 39 44 90
RYLENGKETLQRGE	77	14	564.96	39 43 72 91 84 93 100 100 100 99 94 39 35 93
LLPEEKSMVP	77	10	571.815	99 98 99 98 88 33 33 33 93 97
TYHYFKDGP	77	9	376.512	69 54 45 75 97 86 86 90 94
LVVEPGCCTAETYSQEAYQ	77	19	697.644	96 97 99 100 99 80 57 34 30 32 71 98 99 97 92 91 63 46 84
MEFTCPHSLS	77	10	576.247	94 98 96 62 57 85 40 59 82 98
DMSSFTLPEAGMLK	77	14	763.866	69 55 98 100 100 100 96 90 99 39 21 45 77 94
TEGGEYVHDQTQDTELVETRPA	77	22	825.707	39 52 59 73 82 57 52 40 74 57 59 97 99 99 100 100 100 100 99 99 74 86
RAKPPVQVYS	77	10	572.828	80 79 79 69 63 62 62 80 96 97
TLAPW	77	5	587.322	69 62 68 93 93
FLAA	77	4	421.244	72 63 88 85
TSLLNKLL	77	8	451.29	84 78 89 95 72 45 56 97
KALEGDAEWEAKLLE	77	15	851.44	93 73 69 63 35 54 52 76 66 86 99 96 97 99 99
EQGQDYWDEETKRV	77	14	594.936	56 45 69 73 99 100 100 100 100 99 88 33 39 79
FSTDFFLSRK	77	10	416.553	33 41 74 99 100 100 99 67 62 97
LGFDKLK	77	7	410.75	52 43 87 82 82 95 97
WSTAADMHKHLP	77	12	697.344	80 88 100 99 99 98 92 28 30 23 93 96
KPTRQLMLQVYSR	77	13	405.731	75 66 72 54 52 74 32 88 90 98 100 100 99
TVYCMLHDY	77	9	382.163	76 54 59 59 55 97 97 99 99
QSRALLFSPHARP	77	13	493.944	41 38 31 38 84 99 100 99 98 95 95 88 96
SLGVVANKELDGQVNVKAGMLPY	77	23	601.325	51 57 75 82 82 82 67 84 70 95 81 54 96 99 99 100 100 99 92 20 32 66 89
EAADMLWKVLE	77	11	652.837	86 82 96 100 95 57 38 40 55 98 99
FFGPF	77	5	614.3	75 55 82 89 84
TFFYMKSVP	77	9	560.283	98 98 100 97 28 32 48 95 98
KLVNDEAVSEFGTLP	77	15	809.924	92 95 100 99 99 98 60 50 43 49 33 45 95 99 99
RGPFPL	77	6	343.702	65 60 66 77 97 99
KDDAGGH	77	7	699.306	68 73 72 86 84 69 85
MFTLNEARVSLGQFLAPQ	77	18	674.689	90 98 100 100 98 85 76 68 67 82 48 31 79 41 54 93 90 88
VLLKPAVKA	77	9	313.551	28 51 84 98 71 71 97 95 98
EMFMFGPDEVP	77	11	649.78	100 98 99 92 62 44 49 68 57 85 94
LTDLRW	77	6	402.224	63 65 84 88 85 77
EVKQLATLAEAGAEVEVK	77	18	629.014	45 32 40 46 55 48 56 85 95 100 100 98 90 98 99 100 100 99
SDVGEHALAP	77	10	498.243	92 96 100 100 99 45 39 37 77 87
KATLLGLAVR	77	10	521.343	100 100 100 99 98 51 46 38 46 90
EDGALKKSLYAVRT	77	14	517.623	79 62 57 67 80 94 100 99 98 97 90 46 40 67
FGADVTLVNALLEDFKVE	77	18	660.683	65 48 54 56 41 55 81 66 56 74 93 100 100 100 100 99 98 98
MEFMGPHSLSYFYTPPDVVSEVM	77	23	666.557	100 100 100 100 100 100 100 100 100 100 100 100 99 84 84 61 55 34 27 21 34 32 40
KLELTLHMR	77	9	380.888	95 96 91 85 94 90 31 26 86
TVEVFHDLY	77	9	561.778	75 69 86 74 69 52 83 85 98
LAVGYHCDGAP	77	11	551.756	98 94 93 90 78 20 43 74 85 84 89
TVDHTKLTF	77	9	531.284	63 55 67 41 78 94 97 99 99
VVEPPGECCCDMEAGP	77	16	818.317	99 97 100 98 95 79 97 90 66 34 41 25 56 74 86 92
QGAVRGPLPLPTR	77	13	454.605	37 23 44 77 87 88 84 94 100 99 90 87 90
VAVESLQRV	77	9	500.793	61 83 100 99 94 92 80 28 52
RVGYADEVVSGKLEAKKK	77	18	495.036	54 49 69 95 97 100 100 100 75 40 29 38 56 96 90 96 100 100
KWAAL	77	5	588.351	69 59 73 86 96
GPLGVP	77	6	539.319	79 46 63 90 91 92
TVLF	77	4	479.286	79 51 92 85
VGNVLAGEVKVTLLVPW	77	17	598.692	45 38 60 84 98 75 50 71 95 99 99 98 96 68 49 85 94
KHAEDPFVTKTPAPAVLLK	77	19	688.062	45 21 48 60 54 41 82 99 100 100 100 100 98 75 59 77 100 100 100
KKVDVDVTASSKGKGAF	77	17	434.994	74 50 60 76 82 85 72 88 39 40 90 96 90 90 89 89 94
ESTDMAAAGLKTR	77	13	675.839	50 37 65 100 100 100 100 84 59 89 57 62 95
FREDFGKKVR	77	10	321.182	45 46 82 88 75 56 77 99 100 100
RFLAVG	77	6	331.703	37 51 83 94 96 99
MLAKDYAHF	77	9	365.848	31 54 93 95 95 73 87 75 88
TLNLGDAEWEAK	77	12	449.558	46 40 46 61 63 87 90 98 94 97 99 99
TGPLVFLVEDGAP	76	13	438.902	81 62 88 87 94 79 75 61 61 52 75 84 96
FLAGPDL	76	7	732.391	85 85 86 75 88 56 62
KVSVDYWVVSVGAP	76	14	502.608	73 79 92 99 98 88 32 30 72 82 70 67 92 95
TVDPELVPAGGK	76	12	394.88	68 57 55 30 56 95 99 99 90 78 95 98
KRPF	76	4	547.333	94 59 74 79
KAETTLPHDRLVVKR	76	15	441.512	62 54 66 52 60 69 61 85 97 97 74 76 98 99 99
LGLLHEYMVP	76	10	586.314	54 67 100 100 98 72 46 37 95 97
TPLPQTTLLSHTVP	76	14	752.923	26 21 51 62 70 88 91 96 99 98 92 91 92 95
PKLVKDLTVHAPVKWDRD	76	18	424.241	44 68 93 95 86 86 82 66 52 35 56 52 97 99 96 96 78 94
FLAF	76	4	497.277	63 52 97 95
PGATGSDLLNLVKPAVKA	76	18	584.341	21 31 61 87 81 77 87 92 91 59 94 98 98 85 62 77 86 90
TPGSRHQFGKAKTAELVETAKR	76	22	603.831	76 59 40 34 35 31 66 90 76 63 52 71 98 100 100 100 100 100 100 98 98 99
EPVSKKDTYGVGLNLTR	76	17	626.347	82 45 59 57 62 55 78 99 100 100 100 99 98 85 46 46 90
KGFCNGLSPLM	76	11	583.79	56 54 77 84 95 92 90 44 52 99 99
TLSPAVLHHY	76	10	379.873	71 62 65 56 55 88 96 90 86 95
LSAQRKLFSPHAPR	76	14	402.734	62 49 40 32 39 73 91 100 100 100 99 99 94 95
ETLVERTDQPGTFQK	76	15	583.632	99 98 100 100 93 37 50 94 50 41 40 54 95 97 99
RAVFEMVKPPQVY	76	13	521.954	29 49 92 97 98 90 81 60 50 62 90 97 99
LHVHDENNEQPVEHYWDPELLFA	76	23	708.585	99 96 100 100 100 100 99 99 100 68 48 46 57 35 98 100 99 70 77 59 63 14 32
KPLKYNKWDRDH	76	12	400.718	75 62 74 54 38 40 88 98 99 96 97 94
MLARELQDY	76	9	569.782	81 87 74 31 54 72 89 100 100
TVNKGLFFEAR	76	11	427.903	51 48 51 52 56 88 100 100 100 99 96
TPPPGLAMQ	76	9	911.464	60 51 66 62 89 91 89 88 91
TGDWHRVGAY	76	10	581.275	52 45 95 98 97 85 76 45 82 88
TLRGNPELR	76	9	352.537	84 56 48 45 75 98 98 93 92
KFRVHPLYGKF	76	11	464.603	56 33 35 54 76 98 99 97 97 97 99
KGGGGGKETLQGRE	76	14	458.572	74 57 69 57 44 85 94 100 99 98 88 61 49 93
RLDQDTHAF	76	9	368.18	60 67 86 80 99 96 43 63 93
TFFYVWKER	76	9	425.892	100 100 100 99 60 37 34 66 92
LAPFKLY	76	7	426.255	40 41 61 94 99 100 100
HDNGMMVHY	76	9	368.484	38 65 60 62 90 95 95 86 95
TLSCFYHF	76	8	509.225	91 72 56 43 56 95 98 100
KVRLDGF	76	7	417.745	100 95 46 35 60 98 99
TVDGKKRKKLLDDSLFKF	76	18	535.311	26 28 55 40 61 84 68 59 76 95 98 100 99 95 94 99 99 99
KQDTLVMHY	76	9	378.858	56 38 67 75 93 99 94 80 85
SLLTKFFLDK	76	10	404.573	49 51 57 50 89 98 99 98 81 92
KLQLVGVNHVP	76	11	602.365	98 97 96 96 96 59 50 39 24 92 93
PLRLLEDLF	76	9	558.327	38 45 56 85 87 87 91 99 100
EPALTGGP	76	8	741.382	72 50 70 93 66 66 94 98
TGGLKPLVKDW	76	11	405.236	45 35 48 71 76 71 97 98 98 100 99
TAGGLLRHSY	76	10	358.863	61 43 45 57 96 98 87 77 98 99
PDFGRDQDMSYFYTNFPGLP	76	20	789.687	51 68 75 66 54 55 29 40 38 98 99 100 99 99 95 99 99 98 77 87
PGGELLNSLAAVYLP	76	15	757.413	31 33 48 89 98 99 88 40 52 93 92 90 95 97 98
EFFW	76	4	628.278	72 44 96 94
NGDHVARKPPVQ	76	12	439.904	23 24 71 90 99 95 97 79 63 79 98 96
EVVPHDVLF	76	9	527.783	71 61 77 88 46 84 73 93 93
PVYGARLP	76	8	436.753	100 99 99 52 39 43 86 92
QPGKAVVSVLGW	76	12	620.857	19 18 48 85 92 92 88 86 97 97 96 98
KPLHKATLLGLKTP	76	14	506.328	66 37 51 37 95 96 98 99 98 90 90 59 59 91
TDEAMWHHY	76	9	397.163	68 75 89 75 82 54 46 97 98
SLAEQAPHAGP	76	11	539.273	61 65 69 65 48 87 74 79 96 97 97
RLPGPHEPF	76	9	350.522	73 71 74 76 77 60 78 86 90
SDHFPK	76	6	365.683	49 60 51 99 99 99
PAFSQEALF	76	9	505.253	43 55 81 82 71 88 76 94 96
VLREPVVVAVNKLDKDPAE	76	19	697.731	74 67 67 79 73 84 90 81 92 87 95 96 94 96 90 43 20 30 90
KLPTNAAFF	76	9	504.78	77 67 39 33 75 95 100 100 100
LAAKWAMQ	76	8	918.489	97 81 68 41 45 93 86 97
KPHLQKLDFVAR	76	12	363.717	84 66 40 50 46 57 89 98 97 98 97 91
ESSGPQYELRTH	76	12	468.56	67 51 55 43 39 74 100 100 99 95 96 96
TTGDLPAW	76	8	430.711	96 82 79 67 82 37 68 99
RVALADKY	76	8	468.269	31 34 61 91 95 98 100 100
ESGNQVLVLTGKDKWVL	76	17	472.267	89 70 45 34 57 98 100 100 100 100 98 96 98 92 34 27 55
TVFKLEAE	76	8	468.756	78 55 54 49 76 97 100 100
EGGCNTAAQLTKR	76	13	674.83	88 71 62 34 28 48 98 97 92 93 90 93 95
EQDLAGLFPY	76	10	576.783	54 45 85 83 62 59 85 96 95 95
EEHDPFYML	76	9	590.754	97 73 51 68 44 67 99 89 97
LGVESAPVLAASQR	76	14	466.601	83 82 99 99 93 51 37 45 59 91 89 74 69 92
TVAAKMPSS	76	9	446.233	70 34 48 70 85 85 97 97 99
TVLDKKPLVK	76	10	380.916	61 56 88 93 88 46 39 91 97 99
ATDHRQALVPQGKAVPATK	76	19	663.374	49 44 60 30 44 46 66 96 100 99 94 65 70 95 96 97 97 99 99
NPLLMLYHF	76	9	574.303	45 41 70 76 61 98 98 96 98
EHLMFAYFR	76	9	405.199	92 55 69 49 96 97 88 56 82
QMVLLLDKV	76	9	529.817	31 21 83 99 100 97 90 71 92
RHNPLLVR	76	8	335.541	73 50 76 97 97 66 56 93
TNDLSMHAF	76	9	518.232	70 60 98 66 59 90 60 82 99
TSEDNKNLEMCSDC	76	14	794.799	60 65 91 97 88 90 78 95 99 99 69 24 29 80
LANEDKMSVP	76	10	552.278	80 75 98 99 97 50 26 45 92 97
TLRQEEGVVAGGGVALLRAV	76	20	665.718	49 41 39 48 78 82 74 94 100 100 100 100 100 100 100 100 99 40 27 49
LVASRLEGFY	76	10	577.814	99 99 98 56 39 45 57 66 100 100
RQDYLRAMY	76	9	405.87	37 38 75 93 100 88 78 75 99
FSLY	76	4	529.266	65 48 97 95
TVPGVELFYSKN	76	12	451.906	62 56 59 59 57 65 71 97 98 97 96 92
TAHSPLHDY	76	9	520.744	78 59 31 46 71 100 100 100 100
VSPLLLRPW	76	9	540.832	56 71 99 100 99 52 35 79 92
HDDLAYHF	76	8	339.819	73 89 86 66 59 67 75 91
WGPT	76	4	460.217	92 75 69 68
MLEPHEFML	76	9	573.771	37 59 96 68 59 93 91 82 99
PSFSDLSEAPNPL	76	13	687.334	37 43 66 81 93 90 56 66 91 99 95 80 89
LALSDVNAMMGGEP	76	14	702.835	81 84 98 98 97 94 82 79 33 26 32 70 91 96
FGTTCCDDGPDGLLLTQF	76	18	634.951	60 52 66 54 44 38 54 74 95 99 100 99 100 100 99 60 84 89
MQVLL	76	5	603.353	28 54 99 100 100
EKTLAVP	76	7	379.226	75 59 66 56 82 93 97
YVPFQAPGFP	76	10	561.784	82 79 95 95 59 57 81 61 66 82
EVRPVPWDF	76	9	572.794	68 54 69 79 86 66 63 97 98
LLTLLQG	76	7	757.482	82 75 77 82 93 51 69
TPASEDLHKF	76	10	382.192	63 25 34 48 89 99 100 100 100 100
FGAPL	76	5	504.281	57 55 73 97 97
QKVGPATGSDLLVKPAVKA	76	19	627.039	29 29 51 80 75 72 89 86 84 99 100 100 100 99 78 35 62 82 90
VLAAWKVPEPGE	76	12	648.355	37 39 55 81 92 97 100 100 85 78 51 96
TPLDAKAGGW	76	10	508.265	74 35 57 65 52 79 97 98 98 100
EMLVEFKCSAPGMP	76	14	769.862	83 60 99 99 98 39 28 38 62 80 90 94 92 99
FYPPKEVSKFFGY	76	13	402.961	95 95 89 79 49 48 57 52 99 99 71 56 95
TVPEEKAMSTK	76	11	407.548	55 45 41 57 62 90 94 89 99 99 100
TVREPPQE	76	8	478.248	79 34 30 73 100 99 92 99
LAPLKELAPF	76	10	549.832	78 81 99 99 86 66 40 35 85 88
PQAAHFLVPQGKAVPATK	75	18	465.768	21 30 59 60 44 82 97 98 95 86 49 60 94 97 97 97 98 99
HTEFTPAANDENYALAA	75	17	917.914	19 27 62 74 91 91 95 97 90 93 93 82 95 94 68 50 65
EVPNPL	75	6	334.684	54 54 71 92 89 95
LQRTKPLQVYSVGHPAED	75	18	680.032	34 31 59 67 61 66 90 95 99 98 85 31 51 98 100 100 98 98
FDDGP	75	5	550.217	48 66 78 95 92
TLRCALDGFP	75	10	546.774	84 69 55 51 56 95 88 71 93 95
KPKLVKHMQESP	75	12	474.605	100 98 95 94 98 96 77 27 34 51 49 88
TVDGDTAHF	75	9	481.714	66 66 96 46 46 75 93 94 98
TGNSLVYHSW	75	10	582.28	67 34 45 56 75 88 99 95 98 99
ALKALEDGAEGFNVP	75	15	765.894	35 57 98 100 100 100 92 59 55 67 43 49 89 95 96
SLTGSHLAVDLVER	75	14	499.608	50 49 49 37 44 45 94 100 100 100 99 97 98 98
LALDFFLSRK	75	10	605.353	88 75 97 98 99 89 59 22 34 97
WEVVVNACKGP	75	11	401.207	99 99 86 78 71 67 69 56 39 77 88
KSMKALPGSK	75	10	349.541	72 56 34 41 55 98 100 100 100 100
ALLDFEKKVF	75	10	605.354	83 85 98 96 83 41 30 70 74 94
LALSENATRVP	75	11	585.828	100 99 100 98 70 41 40 43 50 94 97
EFCCAAGP	75	8	797.295	98 44 49 51 71 98 97 98
PGAGKAVLVAP	75	11	490.301	33 39 65 70 81 88 92 88 92 90 95
EGPVGLSTGTKH	75	12	591.81	91 80 93 100 100 100 73 41 68 37 51 73
KDGAQREVLVLTGKDKG	75	17	454.259	45 55 45 29 23 31 82 91 98 100 100 100 100 100 100 93 93
TVYL	75	4	495.278	49 73 85 95
DGRSFLAV	75	8	432.733	75 54 59 54 68 95 100 100
TVGDYLKFYR	75	10	421.228	46 38 46 81 94 100 98 86 77 89
EPLMPPNYAPNRP	75	13	748.377	79 43 48 24 39 68 96 98 98 98 96 98 99
VPWLQQE	75	7	450.235	73 67 88 88 41 77 95
YPLMAVP	75	7	790.413	91 86 98 85 81 34 54
TVFSKDW	75	7	441.722	78 75 83 90 49 60 93
KNGVEEL	75	7	394.712	75 46 50 62 95 100 100
PFEKLLDPY	75	9	561.3	33 45 78 60 71 95 99 99 99
AVGLLLDKGL	75	10	499.817	21 31 75 100 100 97 79 79 85 88
HAGLVEFVAR	75	10	366.873	21 37 56 88 95 95 97 94 91 81
SAGDMELVVMSQEAP	75	15	782.351	46 50 70 94 78 98 97 83 24 24 95 91 93 92 96
MMHPLVELF	75	9	558.783	95 71 33 33 69 84 95 100 100
TVPDRLEEW	75	9	572.787	70 61 48 54 54 94 99 100 100
SDVLHPEHAP	75	10	367.849	56 69 79 99 99 97 74 23 75 82
SVDDCCGGPDWLFLR	75	15	561.582	45 50 77 67 41 45 59 98 98 99 97 97 87 82 88
TVFGVLVALSR	75	11	387.908	84 82 97 75 39 44 60 90 83 85 90
LEGGKTELLEAVAAM	75	15	766.407	49 52 54 54 48 45 70 85 94 95 90 98 99 100 100
TFFYKGNSR	75	9	373.857	92 93 98 99 94 76 28 22 76
KANAHLKFAY	75	10	388.217	55 43 38 55 87 98 98 90 92 97
GLRYFLPHVNK	75	11	336.693	35 44 57 77 71 73 96 93 92 91 99
LAAVVPECCCSPGEEPAGH	75	19	934.906	80 61 76 94 99 99 97 78 83 94 90 45 25 41 85 73 76 44 94
ETCRTLEMGKD	75	11	428.199	70 43 39 33 59 98 99 98 96 96 98
EMYVARPKP	75	9	545.79	63 27 54 90 85 82 90 91 95
TAAKAALHLLVK	75	12	412.601	69 71 83 75 46 35 48 87 98 98 96 98
LLDENMLEVP	75	10	586.802	100 99 100 97 39 18 37 84 87 94
FASGFERLSQ	75	10	571.286	61 62 95 95 95 96 59 51 48 91
LAKMASHWAAGP	75	12	620.323	59 76 99 99 94 37 12 40 97 98 98 98
GYVDDTKFSAP	75	11	600.288	82 89 100 100 99 95 41 32 30 75 88
KGLLDLVRVPF	75	11	419.596	73 73 93 100 100 100 100 63 29 20 79
FGGGKKFKVGGH	75	12	406.893	69 63 74 67 68 55 74 91 92 73 79 95
TVNWAHLVPQGK	75	12	450.582	61 54 54 50 51 63 99 100 95 84 95 97
FFKLSR	75	6	399.237	98 96 94 79 32 54
EGEDLMLKF	75	9	541.266	85 46 76 85 81 51 68 91 94
YPGARTPKLQVY	75	12	696.887	79 61 43 40 59 75 74 85 93 96 98 100
TPYLQAVHF	75	9	538.283	83 70 86 79 43 33 86 97 99
VLDARNTGPAP	75	11	555.802	99 98 97 46 35 41 51 67 96 99 99
TVHKDLKPLKVKWDRDH	75	17	423.842	76 82 85 70 54 49 61 38 33 39 98 99 99 99 97 100 99
FDSDVGEHVGP	75	11	579.755	96 98 94 96 96 61 69 32 44 50 91
VVSYTKSAGP	75	10	504.774	97 94 87 69 50 41 44 84 93 94
KNEHKLEEATSDYDRWALQRLW	75	22	697.853	46 43 60 30 73 99 100 100 100 100 99 99 89 90 91 69 48 44 78 43 60 96
ELRFVKHPLGY	75	11	453.592	77 66 56 41 46 71 80 94 97 99 99
HVTLDKVLKP	75	10	383.904	59 80 89 90 85 79 94 70 39 67
KSMAVSSGMQLPPGF	75	15	768.881	49 28 19 35 67 94 94 88 79 92 100 100 96 93 96
EQGPEYWDRFRGGP	75	14	847.393	72 65 96 98 100 100 97 96 46 44 61 80 38 59
MDSSFTPLEQML	75	12	699.818	27 52 54 62 77 98 83 82 93 96 85 90
QRLRLLR	75	7	318.882	46 48 71 73 97 97 95
RYLPKVPWLSK	75	11	462.947	29 31 48 59 82 93 99 97 95 96 99
EVGDGLPNKQSGPPAP	75	16	781.894	52 35 60 98 100 100 66 38 45 61 95 96 85 79 96 97
KWAALVVPANETDP	75	14	755.9	79 69 81 85 93 99 100 97 41 29 43 45 96 96
TMSSKKYASW	75	10	594.79	69 40 89 62 59 66 73 95 99 100
DPFVNMVQVRLVY	75	13	527.282	72 63 89 68 43 32 94 81 92 82 63 98 99
HLAVEFEGGW	75	10	382.186	37 73 86 96 93 62 68 71 73 90
NSSYDVSSTKVLKAELAAR	75	19	680.363	48 77 100 100 99 55 34 31 46 93 98 99 98 91 73 91 48 55 93
KDNAQTYGVGLYWKVQYNQSEAGSH	75	25	711.59	46 60 70 78 85 99 100 100 100 100 97 17 6 6 12 45 99 98 99 100 100 100 99 85 80
TVDLKLVKY	75	9	539.829	41 38 63 69 76 93 97 99 99
VSGVQREFVARPP	75	13	481.272	89 52 50 32 26 37 98 100 100 98 97 99 99
EAGDHVYTDY	75	10	585.241	74 50 51 63 50 93 91 79 99 100
KALWKKTLLLLQVSEAGSH	75	19	531.318	99 99 99 69 55 52 56 73 75 52 39 28 39 98 99 99 97 99 98
TVPKSAPALTR	75	11	380.899	74 46 39 43 51 78 100 100 99 98 97
KAGDELKVHTP	75	11	398.884	92 70 72 88 96 96 74 35 46 75 82
TDENKFLGG	75	9	490.738	70 63 62 46 56 91 98 92 96
TVHLDKPKLVK	75	11	426.603	55 54 62 93 98 98 95 46 46 78 100
MNGTNWKLEHH	75	11	342.413	38 32 43 65 72 87 94 99 99 99 99
TLLLKNQALLQG	75	12	656.405	98 98 99 84 62 52 56 76 86 98 45 46
ESLLKALDLLTYTNK	75	15	574.666	63 38 46 46 48 69 89 100 100 100 100 100 98 55 75
LTVHWLEEATSDTPKAFGTLEVASW	75	25	697.853	95 55 46 23 52 92 100 100 100 100 99 98 80 70 70 62 60 44 24 77 66 86 86 95 98
APAPTKGPWLDAMEFLLKN	75	19	700.372	41 73 82 65 68 61 44 54 78 69 98 99 99 100 100 100 99 45 52
TAEPLAWKF	75	9	531.785	48 45 71 62 76 96 92 91 94
PGLPLRTP	75	8	425.761	57 73 99 98 95 50 41 86
FGSVQHLAADTAAQLTKR	75	18	638.678	52 38 51 52 48 25 57 92 98 100 100 100 100 98 98 70 75 97
KVHEVLKMPLVKH	75	13	390.238	70 60 63 93 82 57 38 29 91 97 98 99 97
EAGDCEHEPLVPEGSAF	75	17	893.888	82 66 72 80 43 41 25 98 97 97 72 66 95 72 78 96 97
RDDEVLVLTGKDKGKR	75	16	458.011	19 34 69 97 99 100 100 99 97 57 62 98 93 39 48 89
ATVNAGLVRKVPQ	75	13	451.609	99 100 100 97 56 55 77 75 75 93 45 29 73
TAAPKMAANVAER	75	13	443.906	77 77 70 34 34 38 96 98 94 95 82 88 91
TLGADFAVHF	75	10	539.276	59 55 43 46 73 97 94 92 93 97
ETPADTNHKW	75	10	400.187	50 34 39 55 92 96 93 92 99 100
TADEVMRYP	75	9	541.252	78 75 98 98 92 27 55 69 83
VMDFF	75	5	658.29	46 38 91 100 100
ELRSAKFFY	75	9	580.81	73 54 50 51 63 86 97 100 100
RGGEKVKLVFK	75	11	315.949	43 50 68 83 79 80 63 71 93 96 97
KVVSCSSGMQLPPGF	75	15	768.881	59 44 40 37 55 90 90 77 60 80 99 100 99 98 99
LVSPNSDTGYEWLHQ	75	15	873.413	90 95 100 100 97 98 99 61 48 88 39 24 77 24 86
SMAPAAQLTKR	75	11	391.887	54 32 61 75 99 98 94 92 88 57 76
KPLKVKWDRDH	75	11	474.606	100 84 87 80 99 99 93 41 24 50 68
WTAADNKFGTVP	75	12	653.827	95 99 100 99 98 65 44 35 29 45 94 98
KVGKNVLSGSKVLVELGNLVKK	75	22	578.112	49 43 49 57 62 82 95 92 67 49 63 99 100 99 98 48 31 87 95 97 90 94
TGPLVDDKATLGQ	75	13	657.848	71 78 97 98 100 99 96 90 49 39 40 33 85
KGYRPQFYFGV	75	11	454.575	100 84 48 44 79 82 83 89 82 45 90
TVLDKLKPV	75	9	338.218	62 59 74 82 86 62 61 90 97
VAPAPTKLL	75	9	455.292	62 61 68 74 63 62 83 100 100
KATLKLTQCRRAV	75	13	496.635	93 92 99 100 100 99 95 82 26 19 29 61 80
KANGVAADGVLKT	75	13	622.354	99 77 38 21 40 79 71 81 86 94 99 94 93
VCDMYLHGF	75	9	542.733	40 48 82 60 92 96 71 84 99
FDLF	75	4	541.267	59 50 96 95
KDNAQTYGVGLNTLGRY	75	17	623.987	71 68 40 35 60 88 93 94 98 100 100 97 97 85 31 29 87
KLQTLPTSGEASP	75	13	664.862	100 99 93 79 76 30 29 32 80 82 82 92 98
FVKHPLYG	75	8	480.769	60 55 69 59 82 88 89 95
KDPGGSNSGTFQKAAW	75	16	550.934	68 78 81 80 63 49 48 76 96 99 100 90 48 66 71 85
KNLCH	75	5	614.304	59 55 95 81 83
KELVTLLHAFEVP	75	13	499.288	40 51 56 71 94 100 100 99 65 41 86 82 85
HPGMSLSYF	75	9	519.741	25 49 77 76 71 79 97 100 100
KGDDPEAGASTVEFCDQ	75	17	590.251	44 32 74 93 71 80 85 90 82 98 95 97 97 66 37 46 82
TFFYMSVP	75	8	496.236	98 98 100 100 48 35 33 87
TAECSLVDCL	75	10	527.236	79 57 70 50 79 82 90 86 60 93
SLAVVKNTAAP	75	11	535.815	62 68 85 90 97 48 33 46 94 99 99
KNGVVKFCFEVLELK	75	15	876.988	70 57 73 83 84 44 30 61 49 83 93 99 99 97 96
RLDYDRQLF	75	9	409.216	40 45 76 94 100 89 48 85 97
TVMTDGKFKVR	75	11	427.908	61 55 56 71 84 75 81 96 86 71 86
TATTKKRPW	75	9	544.81	82 80 91 96 51 41 46 90 95
FYEALR	75	6	399.715	46 46 75 87 96 97
TVGDCCVESLR	75	11	394.514	46 40 40 55 68 98 99 99 95 91 90
EFGLP	75	5	562.29	75 56 57 92 91
KVDVSEGLNLD	75	11	594.814	100 100 100 93 63 59 32 39 44 95 97
TADPSHSFF	75	9	504.725	92 93 100 98 93 31 34 39 92
TESDMSAQLTKR	74	12	683.836	39 51 55 95 38 55 95 92 94 90 93 97
KLYTALFERTGK	74	12	357.46	97 95 98 48 29 31 39 93 87 91 92 98
SFGVPTKHVRPLYKEAKLK	74	19	440.462	50 55 84 92 82 72 62 34 45 34 45 99 99 99 100 98 97 81 88
LHDMAKAAEVRAGP	74	14	489.256	73 49 90 85 92 87 95 70 81 39 24 75 89 95
ELHLLSLPW	74	9	554.314	57 41 35 79 80 83 96 100 100
TAPALALGGFP	74	11	507.785	93 89 89 89 85 57 62 49 40 80 88
SYGAADP	74	7	680.293	66 56 48 57 98 99 99
EVAKPLALF	74	9	494.298	68 52 70 63 49 79 91 99 99
QVLEGFKGPF	74	10	561.306	45 56 93 66 39 85 90 89 89 93
ELGGVTLPEMRSVP	74	14	742.897	74 60 65 79 99 100 99 87 73 27 34 51 96 98
RYSSLKFVRA	74	10	307.43	23 24 40 83 94 99 99 97 90 97
TTGEVPAW	74	8	430.711	98 92 72 57 44 50 81 100
EGGLTFPLHAYPLP	74	14	504.604	88 44 55 74 76 82 97 98 90 81 32 34 94 98
YGADSNSMF	74	9	991.383	69 83 90 85 40 48 75 85 96
KLLDEFPGADP	74	11	601.311	100 99 99 98 96 62 43 28 26 76 94
KPLVKKAMDHRD	74	12	479.936	99 81 86 72 85 98 43 18 81 60 78 95
KPSAGPLPLPTR	74	12	411.919	40 28 41 52 61 82 97 100 100 98 97 97
DHGLHVLRF	74	9	365.201	85 51 52 55 85 91 86 78 86
DPNNQSEATGLSH	74	13	685.305	59 39 66 90 93 92 96 97 51 28 70 95 92
ELFF	74	4	555.282	63 40 96 98
ETTKKKATDAGP	74	12	623.841	74 55 55 44 43 63 75 85 99 100 100 100
TAAPNQWTAGFMAAQLTKR	74	19	516.516	82 69 51 37 50 49 60 66 68 55 67 96 99 99 98 97 89 89 93
AADMAAQLTKR	74	11	588.313	52 51 77 78 99 97 85 88 76 46 68
QKENGTYGVGLNTL	74	14	747.384	25 24 45 43 55 88 96 97 97 90 88 98 99 99
ANAWAVPWLQQEGDQ	74	15	856.908	27 31 59 56 52 60 68 81 93 97 98 100 100 99 95
SMDHLVMNF	74	9	547.245	35 24 66 60 92 98 97 99 99
KLLNEMEELLAGP	74	13	728.891	100 100 100 82 46 18 51 77 77 66 60 93 97
FPALVGK	74	7	366.227	40 33 61 88 100 100 100
EHAARSLVPAN	74	11	582.813	86 48 75 66 51 59 91 97 90 77 76
ELGHVFQTDDFP	74	12	702.826	81 56 45 33 67 66 62 84 99 100 100 100
KLDYGKFPW	74	9	385.206	33 35 57 74 78 97 97 98 99
KAELDGALAEWEAKLL	74	16	586.322	25 24 51 72 70 48 60 78 81 91 97 98 98 98 100 100
TVFYGKFLKR	74	10	420.252	48 54 82 80 48 55 92 95 95 96
EFGPHMSLSYF	74	11	657.796	99 93 82 52 32 34 57 76 94 100 100
TPKALDYLK	74	9	350.207	41 32 49 66 95 98 95 97 97
EANVGAKLDFVGGAE	74	15	738.87	57 40 43 37 29 50 87 92 94 95 100 99 97 97 98
LALDFFKRVT	74	10	403.904	77 63 79 98 99 97 91 38 40 60
VLSEVSSVCVP	74	11	559.796	98 96 95 93 90 50 34 28 50 87 97
TVLNTLKKFP	74	10	580.856	45 44 66 82 80 61 77 98 95 95
KMGAVLLLD	74	9	480.284	68 21 33 57 94 99 99 98 98
KSLVVLAVFGE	74	11	581.353	95 90 98 100 97 51 32 38 71 52 94
TAFLPKVPW	74	9	529.81	63 41 56 74 68 79 90 98 98
EARKFGSLTGAK	74	12	632.854	90 71 61 46 49 52 57 70 98 98 99 100
VLEFWKPPD	74	9	565.801	66 68 96 43 34 86 93 86 96
SLTGPTVTVYPAKTQRLQ	74	18	490.778	52 55 62 55 55 71 89 98 99 100 100 100 100 98 74 21 28 81
TVWLKLPP	74	8	477.295	68 56 65 56 56 92 100 100
TGGKPTKPEAGHF	74	13	442.902	56 45 43 37 35 70 92 99 99 96 95 98 100
AEGKNYMQQAQKMLNGVDEKMQ	74	22	847.742	23 39 56 92 71 72 86 82 79 98 94 95 81 79 90 89 66 79 97 92 22 51
KEVFDLMHF	74	9	389.195	30 39 44 81 92 92 98 95 98
PPGEEQSYTCCDPEPVVQEH	74	20	748.65	93 56 75 90 96 74 83 97 96 78 30 29 21 65 69 88 98 86 90 73
ESGLSTEDQTYTGPAP	74	16	826.872	88 80 90 90 79 74 97 93 75 28 24 31 74 74 92 98
ESRQDMGSY	74	9	536.722	68 44 46 50 73 86 100 100 100
TDEHLAFAY	74	9	533.746	85 72 66 30 56 68 92 99 99
KVSRDVADPKE	74	11	311.675	70 57 69 77 83 45 34 89 95 98 98
LDLSLKKPW	74	9	550.328	77 85 91 83 41 39 60 93 98
DSCECG	74	6	307.083	38 45 67 99 99 99
PEAHLDMAF	74	9	515.739	65 85 96 97 99 86 24 32 85
TVFYGKFLRK	74	10	420.252	68 68 82 84 35 44 88 88 89 97
TPSHGAPPF	74	9	455.725	62 41 56 46 79 95 100 96 92
KACDFDLSPLMR	74	12	465.901	59 32 35 50 54 78 98 100 99 97 95 96
TLAKHKPLL	74	9	340.89	66 55 55 56 60 89 90 96 100
LAEYKGF	74	7	414.219	97 91 74 52 56 55 92
ESKVFSLDHYENPR	74	14	430.964	63 51 67 70 52 45 55 97 95 98 97 82 75 90
KLAGLVGVGY	74	10	488.795	52 44 35 37 78 95 100 100 100 100
KDFEDVR	74	7	454.726	48 48 49 95 96 94 92
TPMLSEFYVP	74	10	592.283	93 86 94 97 68 50 34 39 86 94
TLRLP	74	5	300.198	57 60 81 90 82
TFFYMSVP	74	8	496.236	97 93 99 98 37 38 41 92
KPKLVKCPTHSSP	74	13	711.404	99 100 100 100 100 99 49 28 40 72 71 27 80
YGVDDTAGFVAMCFAP	74	16	832.364	84 90 100 100 100 98 66 55 96 97 48 17 25 32 89 91
KGGDEFSVNADLPGPSP	74	17	843.909	50 49 55 60 56 45 45 49 94 95 97 98 98 93 96 98 84
FEGSVP	74	6	635.304	52 63 57 75 97 98
ETAQLVKHYCLHHHH	74	15	463.981	91 67 48 37 51 93 97 89 51 46 57 94 96 97 98
EHDLMEYPF	74	9	590.754	94 35 61 51 50 94 98 90 91
YNKEQSMGQAQKMSAQNGLGGKW	74	23	847.741	54 66 98 95 70 38 20 39 86 99 99 100 99 44 18 28 93 97 95 82 89 99 99
ENLKLTKMLE	74	10	406.896	71 49 73 65 56 63 86 80 98 97
ESAVTPGAESQALFASMQ	74	18	608.626	75 48 40 39 59 68 74 81 90 80 94 90 92 86 87 63 73 94
HHHHNGPEHKHHHHH	74	15	479.472	69 68 82 72 51 30 38 79 54 78 96 98 98 99 98
TNLKAVLTVSVPALGLMGCF	74	20	678.714	31 32 70 86 90 95 95 69 50 54 69 63 95 94 93 92 75 80 60 87
LALDFFKRVT	74	10	403.904	70 59 79 96 98 98 95 44 40 63
ESRD	74	4	506.218	71 43 93 90
LLYGAANPTVQASGE	74	15	745.876	99 98 100 82 57 79 31 21 27 37 82 99 100 100 100
ALPWEHCEVP	74	10	590.778	70 79 98 97 93 23 38 59 89 93
TLNRLAADVGLKT	74	13	457.937	69 59 48 37 59 98 98 96 59 59 97 91 93
LGLLHGYRDQAYD	74	13	760.88	49 40 90 97 98 98 95 56 54 39 62 86 95
FGLGVKFGLSR	74	11	394.236	87 66 86 21 30 86 95 96 78 74 95
ATGKESCLQVTTQKKAN	74	17	602.986	45 41 48 56 73 55 55 60 68 95 98 99 97 99 89 84 96
EHVYMLGLSTK	74	11	426.556	90 46 61 54 43 67 66 95 96 98 98
EVPQSSTPFTY	74	11	628.299	84 65 54 41 39 60 99 96 90 90 96
ECDSCG	74	6	307.083	79 49 61 60 96 98
LVLLD	74	5	572.365	27 63 98 92 90
GFHDPSLETLKKRAELVETAKR	74	22	632.103	43 66 59 63 35 54 82 82 65 59 48 44 46 96 99 99 99 100 99 96 97 98
EGQGFRPLQYAHF	74	13	517.259	74 49 44 30 34 46 96 98 95 97 99 99 100
THSEFLANF	74	9	533.254	75 20 40 66 86 93 90 95 99
KDLLEVELDEY	74	11	455.897	43 54 71 95 98 98 98 95 44 39 79
PAGGKAVVLPAT	74	12	540.825	33 49 71 83 89 94 95 86 73 54 63 96
TLDHLLVQF	74	9	543.304	80 54 63 44 90 98 88 52 94
EHMDMLYMF	74	9	608.746	79 31 44 75 57 86 96 97 99
MADYLEHVGW	74	10	407.521	28 41 77 99 99 99 79 40 86 91
TEAHQELTF	74	9	538.257	79 75 60 32 49 79 93 100 99
VEKGVKVKGLNTLR	74	14	385.996	89 59 50 32 30 35 69 98 97 97 96 94 95 93
LAAVVPPEGEQEMEDQRCMT	74	20	1117	86 73 85 99 100 100 98 97 92 74 57 92 43 92 90 82 30 25 14 48
KLQELGALLDKVH	74	13	488.628	99 98 96 99 97 75 67 35 30 30 35 98 99
KLRQELGARTL	74	11	428.93	55 44 49 77 100 100 99 97 49 49 94
FDDPL	74	5	606.281	52 73 79 79 84
VAGALKLPDF	74	10	515.801	19 20 34 76 94 99 100 99 99 100
VEGVDVRHDW	74	10	404.535	85 57 50 52 57 57 94 92 98 95
VNLGSSKVLVSKLLSKGAP	74	19	633.055	59 65 94 76 62 52 76 99 99 98 43 31 83 94 92 94 88 43 51
VQVPPKRAVFEMSY	74	14	550.961	37 35 70 54 49 62 60 76 95 98 100 98 99 99
EVSNAHLDFVR	74	11	429.554	55 33 40 54 95 97 99 98 70 73 96
TPVPVLVVR	74	9	490.323	61 39 61 91 93 88 70 67 95
ECDSCG	74	6	307.083	82 46 59 61 96 98
KNCSHSLSYF	74	10	593.274	56 44 54 83 39 80 88 93 100 100
DHGLPNPVDVAW	74	12	660.324	32 15 46 74 76 73 79 90 99 99 100 100
FYYTAVKDDP	74	10	609.793	66 63 96 94 70 56 52 48 94 96
EADVP	74	5	530.243	65 40 86 92 85
TENTVWWTAADMAAQLTKR	73	19	731.693	35 49 51 45 41 44 59 84 99 96 97 96 99 96 91 97 57 67 95
KTEGGPVGLAQTK	73	13	643.364	62 60 80 55 44 38 48 72 100 100 99 100 100
KLYFQ	73	5	349.696	67 61 74 93 72
TVGALEAQEVEVK	73	13	458.249	65 49 43 48 70 86 61 79 91 83 93 95 95
KAMSLPGSK	73	9	459.762	99 33 21 37 74 100 100 100 100
SVDDFGAVVY	73	10	536.254	50 52 81 90 78 52 56 79 98 99
KVAAPSFGVQKAL	73	13	329.701	74 63 87 97 100 99 65 27 25 31 91 99 100
THYALQADF	73	9	533.254	80 46 72 60 56 61 88 100 100
ESGVHVGQTVLRE	73	13	470.92	70 50 54 54 33 68 92 92 97 95 90 63 97
KLANVAVLK	73	9	319.215	65 44 37 46 79 95 96 99 100
KPLVGSVKHMSEGAP	73	15	512.948	79 72 88 76 43 39 89 95 88 43 49 66 90 93 98
LAAEVFEGSLTDLPNPKA	73	18	936.491	97 93 95 97 99 95 93 75 21 28 91 98 97 72 60 29 32 54
KDAAVMLTTDARV	73	13	348.441	37 46 54 74 81 50 66 94 98 97 88 82 89
FYGALP	73	6	667.346	50 50 66 85 95 95
ECDSCG	73	6	307.083	81 46 60 60 96 98
TLRCPLTLMTAGP	73	13	687.364	68 68 70 77 98 99 99 98 70 17 20 79 94
TDQRLESTY	73	9	556.765	69 65 52 59 61 71 86 100 100
KPLVKEVKCCFLGAP	73	15	408.73	69 55 73 61 56 74 96 97 72 50 44 70 93 95 97
LALDFFKRVT	73	10	403.904	69 68 90 99 99 96 88 33 33 60
FDLF	73	4	541.267	57 49 94 93
QSQDMELVETRDPSGGTFQ	73	19	1062.98	38 38 73 100 100 100 100 100 100 100 99 77 40 46 40 37 54 86 71
KLLDGEGVNK	73	10	358.204	68 88 95 99 92 89 31 33 48 92
AKDHMLAVF	73	9	344.516	28 30 77 90 90 90 77 82 98
FLKPAQPF	73	8	474.266	98 97 98 50 32 31 85 96
VPPGGFLGDEGLHVP	73	15	497.591	98 63 57 59 84 91 84 94 97 56 25 39 60 98 98
ECDSCG	73	6	307.083	82 46 59 60 96 98
CHPLTLRDW	73	9	570.788	54 40 85 99 98 92 40 59 95
KLLDVGWEQNVGVLLRAVK	73	19	713.088	100 100 100 100 63 39 52 68 51 89 98 98 98 96 95 50 29 24 48
GFVAMGGLGNLTSSQAQQMQEK	73	22	761.375	70 33 10 6 6 79 63 73 68 81 96 100 99 98 99 99 97 96 96 90 76 82
EAALSVQVHKF	73	11	410.224	86 69 67 62 50 40 48 96 94 98 98
RPPKVQVYS	73	9	358.542	61 65 78 79 69 52 67 92 98
TAEVEAVHY	73	9	509.747	83 56 86 77 90 48 51 79 91
EVRSWTA	73	7	424.717	69 56 68 63 67 94 96
FGAKGTVRRAS	73	11	383.891	57 52 73 77 69 68 94 96 61 62 96
FYTVSRSGP	73	9	507.257	98 97 96 59 49 41 54 71 96
GPEYWDWKKMP	73	11	718.844	78 82 100 100 98 96 37 29 37 57 95
KRPF	73	4	547.333	71 43 91 90
ESGTAADMAAFLRLP	73	15	775.394	59 46 73 100 100 100 99 98 98 96 27 21 18 74 94
DDDDEETRSQ	73	10	605.231	21 51 99 100 100 100 98 48 35 82
SLPTEKTVYPAKTGKRPS	73	18	654.034	33 49 82 96 92 87 99 100 100 100 100 99 86 34 43 38 29 55
FGVAYGPQVVP	73	11	567.306	70 71 97 76 90 65 51 48 50 94 95
AATYEQLKAAV	73	11	582.817	48 44 61 79 96 90 95 63 49 88 94
[truncated: 5,905 more rows]
